# Supplementary material for: Imine bond orientation manipulates AIEgen derived Schiff base isomers through the intramolecular hydrogen bond effect for different fluorescence properties and applications
Source: Royal Society of Chemistry journal article supplement (doi:10.1039/d2tc01890j), 2022-01-01
Supplement: d2tc01890j1.pdf [file d2tc01890j1.pdf]

Electronic Supplementary Information

**Imine bond orientation manipulates AIEgens derived Schiff bases isomers  
through intramolecular hydrogen bond effect for different fluorescent properties  
and applications**

Da Li<sup>a</sup>, Xiaozhong Liang<sup>a</sup>, Fang Zhang<sup>b</sup>, Jie Li<sup>a</sup>, Zheng Zhang<sup>a</sup>, Sijing Wang<sup>a</sup>, Zhijun Li<sup>a</sup>,  
Yifan Xing<sup>a</sup>, Kunpeng Guo<sup>a\*</sup>

<sup>a</sup> Ministry of Education Key Laboratory of Interface Science and Engineering in Advanced Materials, Research Center of Advanced Materials Science and Technology, Taiyuan University of Technology, Taiyuan, 030024, China

<sup>b</sup> Department of Energy Chemistry and Materials Engineering, Shanxi Institute of Energy, Jinzhong, 030600, China.

**Contents**

|                                                    |    |
|----------------------------------------------------|----|
| 1. Experimental section.....                       | 2  |
| 2. Figures .....                                   | 6  |
| 3. Tables.....                                     | 15 |
| 4. <sup>1</sup> H NMR and <sup>13</sup> C NMR..... | 24 |

## Experimental section

### 1.1 Materials and instruments

4'-(1,2,2-triphenylvinyl) biphenyl-4-amine (**1NA**), 4-(2-thienyl) aniline (**3NA**), 4'-(1,2,2-triphenylethenyl) biphenyl-4-formaldehyde (**1CA**), and 4'-(diphenylamino)-[1,1'-biphenyl]-4-carbaldehyde (**2CA**) were purchased from Zhengzhou Alpha Chemical Co. LTD. N, N-diphenylbenzidine (**2NA**) and 4-(2-thienyl) benzaldehyde (**3CA**) were supplied by Shenzhen Atomax Chemical Co. LTD. All chemicals and reagents involved in this work were used directly as obtained commercially unless otherwise stated.

NMR spectra measurements were carried out at a Bruker NMR 600 MHz for  $^1\text{H}$  NMR and 150 MHz for  $^{13}\text{C}$  NMR, using DMSO-*d*<sub>6</sub>, CDCl<sub>3</sub> and acetone-*d*<sub>6</sub> as solvents. Chemical shifts were reported in parts per million (ppm) relative to internal TMS (0 ppm). Splitting patterns were described as singlet (s), doublet (d), triplet (t), quartet (q), or multiplet (m). Mass spectra measured on Microflex MALDI-TOF MS. Single-crystal X-ray diffraction data were collected on an Agilent SuperNova (Dual, Cu at zero, Eos) diffractometer. The crystal was kept at 173.00 (10) K during data collection. Using Olex2, the structure was solved with the ShelXS structure solution program using Direct Methods and refined with the ShelXL refinement package using least-squares technique. UV-Vis spectra were recorded in a HITIACH U-3900 spectrometer. Photoluminescent (PL) spectra were recorded in a HITACHI F-4700 spectrofluorometer. Theoretical calculations using density functional theory (DFT) were performed using the Gaussian09 package at the B3LYP/6-31G(d) level.

### 1.2 Synthesis

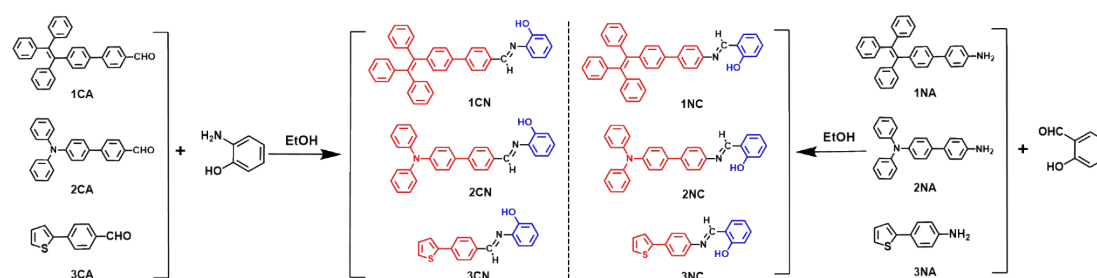

**Scheme S1** Synthetic routes of **1-3NC** and **1-3CN**.

**Synthesis of 1NC ((E)-2-(((4'-(1,2,2-triphenylvinyl)-[1,1'-biphenyl]-4-yl) imino methyl) phenol)**

A solution of **1NA** (120 mg, 0.28 mmol) and salicylaldehyde (70 mg, 0.57 mmol) in anhydrous ethanol (15 mL) was stirred under reflux for 6 h. After filtration, **1NC** was afforded as light green solid (82 mg, yield 68.3%) by washing the precipitate several times with ethanol. <sup>1</sup>H NMR (600 MHz, DMSO-*d*<sub>6</sub>) δ (ppm): 13.11 (s, 1H), 9.03 (s, 1H), 7.74 (d, *J* = 8.4 Hz, 2H), 7.67 (d, *J* = 7.2 Hz, 1H), 7.51 (dd, *J* = 28.2, 8.4 Hz, 4H), 7.43 (t, *J* = 7.8 Hz, 1H), 7.15 (m, 10H), 7.04 (m, 5H), 6.98 (m, 4H). <sup>13</sup>C NMR (150 MHz, CDCl<sub>3</sub>) δ (ppm): 162.17, 161.17, 147.35, 143.72, 143.70, 143.68, 143.03, 141.25, 140.42, 139.37, 137.91, 133.17, 132.27, 131.89, 131.42, 131.36, 127.80, 127.73, 127.66, 126.55, 126.53, 126.47, 126.03, 121.57, 119.27, 119.10, 117.28. MALDI-TOF: *m/z* [M]<sup>+</sup> caclcd. C<sub>39</sub>H<sub>29</sub>NO, 527.2210; found: 527.2209.

**Synthesis of 1CN ((E)-2-(((4'-(1,2,2-triphenylvinyl)-[1,1'-biphenyl]-4-yl) methylene) amino) phenol)**

A solution of **1CA** (120 mg, 0.27 mmol) and *o*-aminophenol (60 mg, 0.55 mmol) in anhydrous ethanol (15 mL) was stirred under reflux for 6 h. After filtration, **1CN** was afforded as light green solid (85 mg, yield 71%) by washing the precipitate several times with ethanol. <sup>1</sup>H NMR (600 MHz, DMSO-*d*<sub>6</sub>) δ (ppm): 8.99 (s, 1H), 8.71 (s, 1H), 8.05 (m, 2H), 7.76 (m, 2H), 7.57 (m, 2H), 7.20 (dd, *J* = 7.8, 1.8 Hz, 1H), 7.14 (m, 9H), 7.07 (m, 3H), 7.03 (m, 2H), 7.01 (m, 2H), 6.97 (m, 2H), 6.88 (dd, *J* = 8.4, 1.2 Hz, 1H), 6.82 (td, *J* = 7.2, 1.2 Hz, 1H). <sup>13</sup>C NMR (150 MHz, CDCl<sub>3</sub>) δ (ppm): 156.58, 152.37, 143.84, 143.69, 143.65, 143.64, 143.61, 141.47, 140.31, 137.69, 135.56, 134.64, 131.98, 131.42, 131.36, 131.35, 129.24, 128.91, 127.83, 127.76, 127.68, 127.22, 126.62, 126.58, 126.53, 126.29, 120.13, 115.81, 115.00. MALDI-TOF: *m/z* [M]<sup>+</sup> caclcd. C<sub>39</sub>H<sub>29</sub>NO, 527.2210; found: 527.2207.

**Synthesis of 2NC ((E)-2-(((4'-(diphenylamino)-[1,1'-biphenyl]-4-yl) imino methyl) phenol)**

The synthetic route of **2NC** was the same as that for **1NC**, except that **1NA** was replaced with **2NA**. After filtration, **2NC** was afforded as light yellow solid (103 mg,

yield 86%) by washing the precipitate several times with ethanol. <sup>1</sup>H NMR (600 MHz, DMSO-*d*<sub>6</sub>) δ (ppm): 13.17 (s, 1H), 9.04 (s, 1H), 7.75 (dt, *J* = 8.4 Hz, 2H), 7.67 (dd, *J* = 8.0, 5.8 Hz, 3H), 7.51 (dt, *J* = 8.4 Hz, 2H), 7.43 (ddd, *J* = 8.4, 7.2, 1.8 Hz, 1H), 7.34 (dd, *J* = 8.4, 7.2 Hz, 4H), 7.07 (m, 9H), 6.99 (m, 2H). <sup>13</sup>C NMR (150 MHz, CDCl<sub>3</sub>) δ (ppm): 162.01, 161.17, 147.59, 147.40, 147.00, 139.40, 134.03, 133.12, 132.24, 129.32, 127.59, 127.51, 124.52, 123.78, 123.06, 121.64, 119.30, 119.09, 117.27. MALDI-TOF: *m/z* [M]<sup>+</sup> caclcd. C<sub>31</sub>H<sub>24</sub>N<sub>2</sub>O, 440.1900; found: 440.1898.

#### **Synthesis of 2CN ((E)-2-(((4'-(diphenylamino)-[1,1'-biphenyl]-4-yl) methylene) amino) phenol)**

The synthetic route of 2CN was the same as that for 1CN, except that 1CA was replaced with 2CA. After filtration, 2CN was afforded as yellow solid (98 mg; 82%) by washing the precipitate several times with ethanol. <sup>1</sup>H NMR (600 MHz, CDCl<sub>3</sub>) δ (ppm): 8.73 (s, 1H), 7.97 (d, *J* = 1.2, 2H), 7.70 (d, *J* = 8.4, 2H), 7.54 (d, *J* = 7.2, 2H), 7.33 (dd, *J* = 7.8, 1.2 Hz, 1H), 7.29 (td, *J* = 7.3, 2.1 Hz, 5H), 7.20 (td, *J* = 4.8, 1H), 7.15 (m, 6H), 7.06 (td, *J* = 7.8, 1.2 Hz, 2H), 7.03 (dd, *J* = 8.4, 1.2 Hz, 1H), 6.92 (td, *J* = 7.8, 1.4 Hz, 1H). <sup>13</sup>C NMR (150 MHz, CDCl<sub>3</sub>) δ (ppm): 160.01, 147.84, 147.50, 134.65, 129.35, 129.32, 129.16, 127.82, 126.79, 125.89, 124.65, 123.53, 123.21, 120.92. MALDI-TOF: *m/z* [M]<sup>+</sup> caclcd. C<sub>31</sub>H<sub>24</sub>N<sub>2</sub>O, 440.1900; found: 440.1897.

#### **Synthesis of 3NC ((E)-2-(((4-(thiophen-2-yl) phenyl) imino) methyl) phenol)**

The synthetic route of 3NC was the same as that for 1NC, except that 1NA was replaced with 3NA. After filtration, 3NC was afforded as yellow solid (95 mg; 79%) by washing the precipitate several times with ethanol. <sup>1</sup>H NMR (600 MHz, DMSO-*d*<sub>6</sub>) δ (ppm): 13.08 (s, 1H), 9.03 (s, 1H), 7.76 (dt, *J* = 8.4 Hz, 2H), 7.68 (dd, *J* = 7.8, 2.4 Hz, 1H), 7.58 (m, 2H), 7.49 (dt, *J* = 6.6 Hz, 2H), 7.43 (t, *J* = 7.8 Hz, 1H), 7.16 (dd, *J* = 5.4 Hz, 3.6 Hz, 1H), 6.99 (m, 2H). <sup>13</sup>C NMR (150 MHz, CDCl<sub>3</sub>) δ (ppm): 162.17, 161.16, 147.47, 143.62, 133.23, 132.30, 128.18, 126.86, 125.08, 123.26, 121.76, 119.23, 119.14, 117.29. MALDI-TOF: *m/z* [M]<sup>+</sup> caclcd. C<sub>17</sub>H<sub>13</sub>NOS, 279.0721; found: 279.0719.

#### **Synthesis of 3CN ((E)-2-((4-(thiophen-2-yl) benzylidene) amino) phenol)**

The synthetic route of 3CN was the same as that for 1CN, except that 1CA was

replaced with **3CA**. After filtration, **3CN** was afforded as yellow solid (102 mg; 85%) by washing the precipitate several times with ethanol.  $^1\text{H}$  NMR (600 MHz, acetone-*d*<sub>6</sub>)  $\delta$  (ppm): (s, 1H), 8.11 (m, 2H), 8.02 (s, 1H), 7.82 (m, 2H), 7.61 (dd,  $J = 3.6, 1.2$  Hz, 1H), 7.55 (dd,  $J = 3.6, 1.2$  Hz, 1H), 7.42 (dd,  $J = 6.0, 1.8$  Hz, 1H), 7.17 (m, 2H), 6.94 (dd,  $J = 8.0, 1.3$  Hz, 1H), 6.89 (td,  $J = 7.2$  Hz, 1H).  $^{13}\text{C}$  NMR (150 MHz,  $\text{CDCl}_3$ )  $\delta$  (ppm): 156.25, 152.37, 143.37, 137.45, 135.50, 134.79, 129.42, 128.96, 128.36, 126.06, 124.21, 120.14, 115.80, 115.01. MALDI-TOF:  $m/z$   $[\text{M}]^+$  caclcd.  $\text{C}_{17}\text{H}_{13}\text{NOS}$ , 279.0721; found: 279.0720.

### Synthesis of **RC** ((**E**)-1-(2-methoxyphenyl)-**N**-(4'-(1,2,2-triphenylvinyl)-[1,1'-biphenyl]-4-yl) methanimine)

The synthetic route of **RC** was the same as that for **1NC**, except that salicylaldehyde was replaced with 2-methoxybenzaldehyde. After filtration, **RC** was afforded as yellow solid (127 mg; 83.8%) by washing the precipitate several times with ethanol.  $^1\text{H}$  NMR (600 MHz,  $\text{DMSO-}d_6$ )  $\delta$  (ppm) 8.66 (s, 1H), 7.71 (m, 3H), 7.49 (m, 2H), 7.44 (m, 5H), 7.37 (m, 17H), 7.05 (m, 2H), 3.87 (s, 3H).  $^{13}\text{C}$  NMR (150 MHz,  $\text{DMSO-}d_6$ )  $\delta$  (ppm) 159.83, 159.60, 153.70, 153.16, 149.56, 142.47, 141.59, 139.60, 139.28, 138.89, 132.47, 131.36, 130.56, 130.54, 130.51, 128.96, 128.81, 128.23, 128.20, 128.17, 127.32, 127.28, 127.11, 126.37, 122.61, 122.23, 113.62, 55.78. MALDI-TOF:  $m/z$   $[\text{M}]^+$  caclcd.  $\text{C}_{40}\text{H}_{31}\text{NO}$ , 541.2410; found: 542.2410.

### 1.3 UV–vis and fluorescence spectroscopic analytical procedure

The stock solutions (2.5 mM) were obtained by dissolving the requisite amounts of **1–3NC** and **1–3CN** in acetone solvent, respectively. The standard stock solutions (10 mM) were prepared by dissolving the appropriate amount metal salts of  $\text{Al}^{3+}$ ,  $\text{Zn}^{2+}$ ,  $\text{Fe}^{3+}$ ,  $\text{Cu}^{2+}$ ,  $\text{Ag}^+$ ,  $\text{Hg}^{2+}$ ,  $\text{Pb}^{2+}$ ,  $\text{Cr}^{3+}$ ,  $\text{Cd}^{2+}$ ,  $\text{Ca}^{2+}$ ,  $\text{Mg}^{2+}$ ,  $\text{Na}^+$ ,  $\text{K}^+$ ,  $\text{Ni}^{2+}$ ,  $\text{Mn}^{2+}$ ,  $\text{Fe}^{2+}$  and  $\text{Co}^{2+}$  in deionized water, respectively. UV–vis and fluorescence measurements were performed in a acetone/ $\text{H}_2\text{O}$  (v:v, 1:99) solution containing the tested compounds (**1–3NC** or **1–3CN**, 25  $\mu\text{M}$ ). Fluorescence and UV-vis spectra were measured after addition of the ions at room temperature to equilibrium. Fluorescence measurements were carried out with excitation of 365 nm.

## 1.4 Recovery experiments in real water samples

The real water samples including tap water and drinking water collected from Taiyuan University of Technology which need no further purification and river water collected from Fenhe River which should be filtered out of the suspended solids with filter paper. The recovery experiments were carried out by spiking the known concentrations of  $\text{Al}^{3+}$  ( $\text{Zn}^{2+}$ ) into different water samples and then analyzing with the same detection method in triple replicates. The detected  $\text{Al}^{3+}$  (or  $\text{Zn}^{2+}$ ) concentrations were calculated by the fluorescent response compared to that in corresponding deionized samples. Then, the recovery percentages were calculated to evaluate the degree of deviation of the detected value compared to the amount of spiked  $\text{Al}^{3+}$  (or  $\text{Zn}^{2+}$ ).

## 1.5 Preparation of test papers

The test papers were obtained by soaking the filter paper in the acetone solution of the sensor (5 mM) and then removing for drying in the air. After metal ions were dripped on the test papers coated with **1-3NC** and **1-3CN** and dried in the air, different response patterns were observed under 365 nm UV lamp and quantized by the fluorescence spectra, respectively.

## 2. Figures

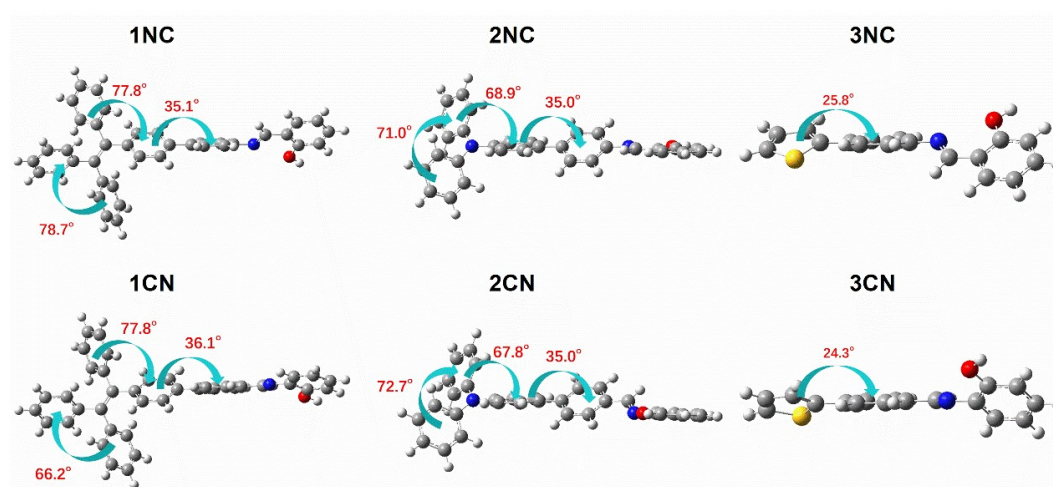

Fig. S1 Molecular structures and geometrically optimized 3D molecular models of **1-3NC** and **1-3CN** by DFT B3LYP/6-31G(d) calculation.

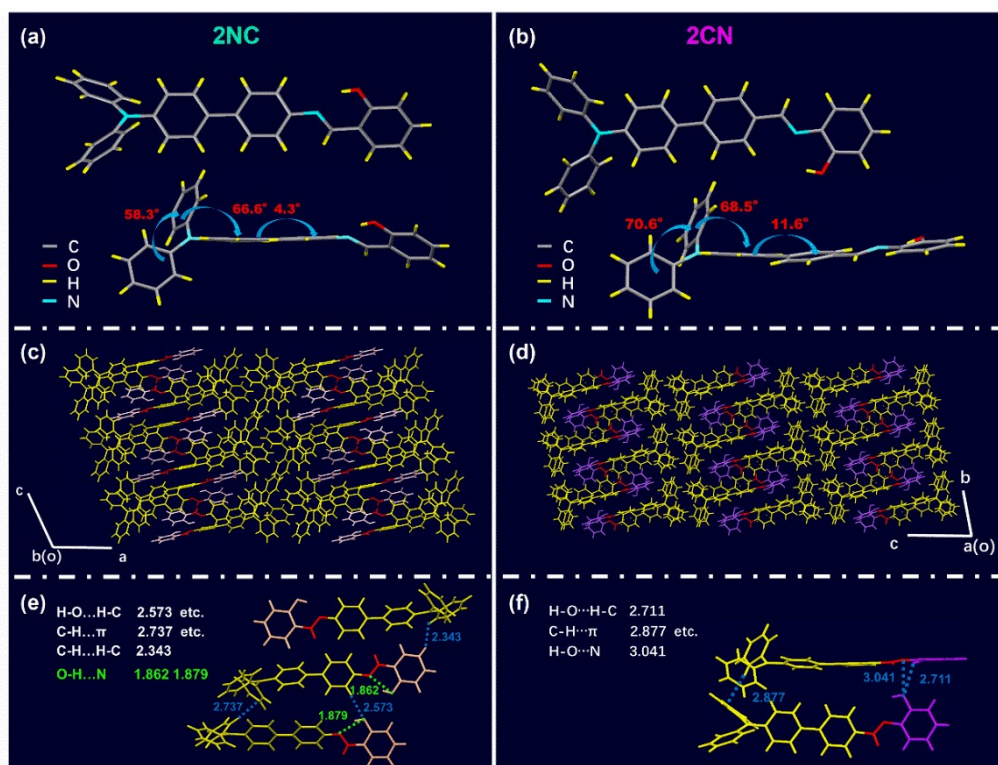

Fig. S2 Crystal structures of (a) **2NC** and (b) **2CN**. Molecular packing of (c) **2NC** and (d) **2CN** crystals. Multiple intermolecular and intramolecular interactions in crystals of (e) **2NC** and (f) **2CN** with indicated distances (Å).

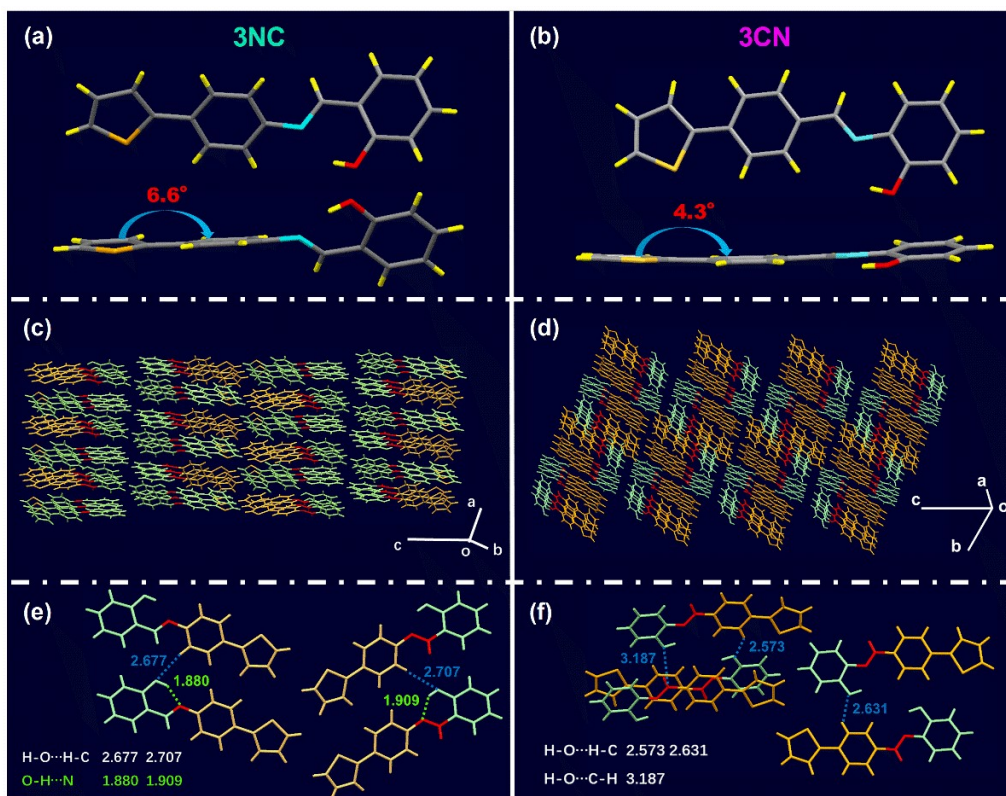

Fig. S3 Crystal structures of (a) 3NC and (b) 3CN. Molecular packing of (c) 3NC and (d) 3CN crystals. Multiple intermolecular and intramolecular interactions in crystals of (e) 3NC and (f) 3CN with indicated distances (Å).



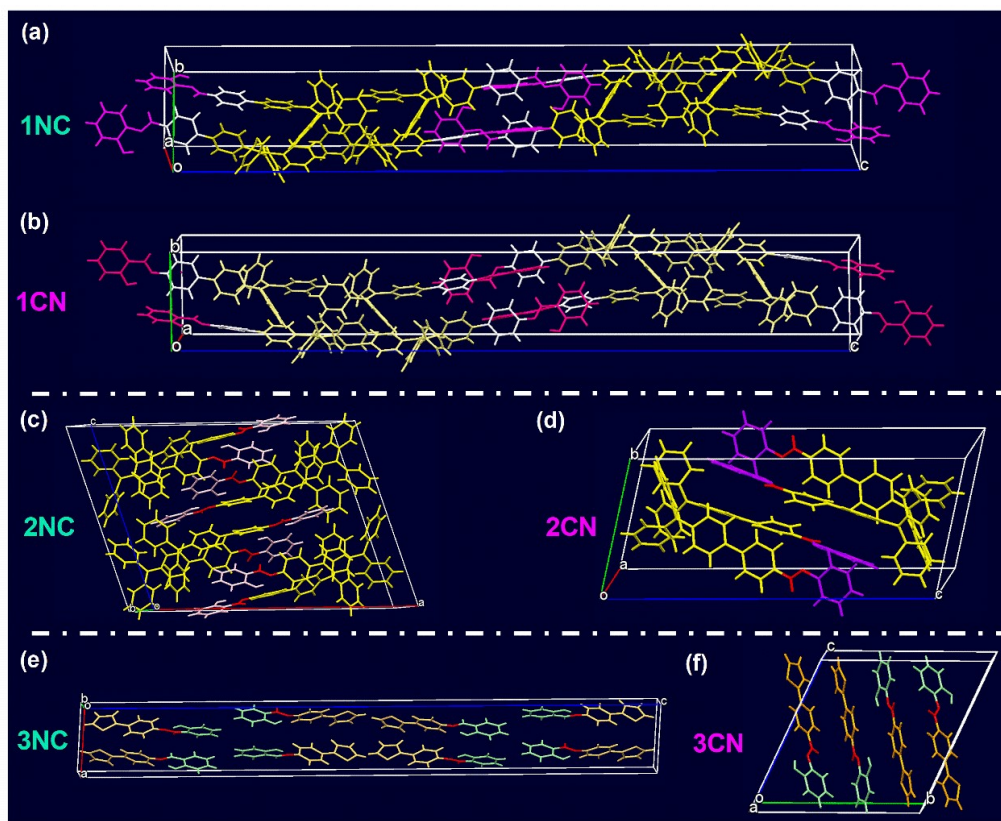

Fig. S4 Single cell units of (a) 1NC, (b) 1CN, (c) 2NC, (d) 2CN, (e) 3NC and (f) 3CN.

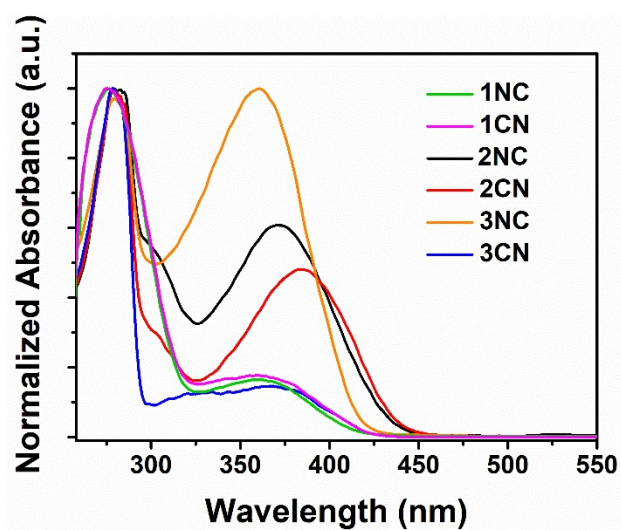

Fig. S5 Normalized absorption spectra of 1–3NC and 1–3CN in acetone solution (25  $\mu\text{M}$ ).

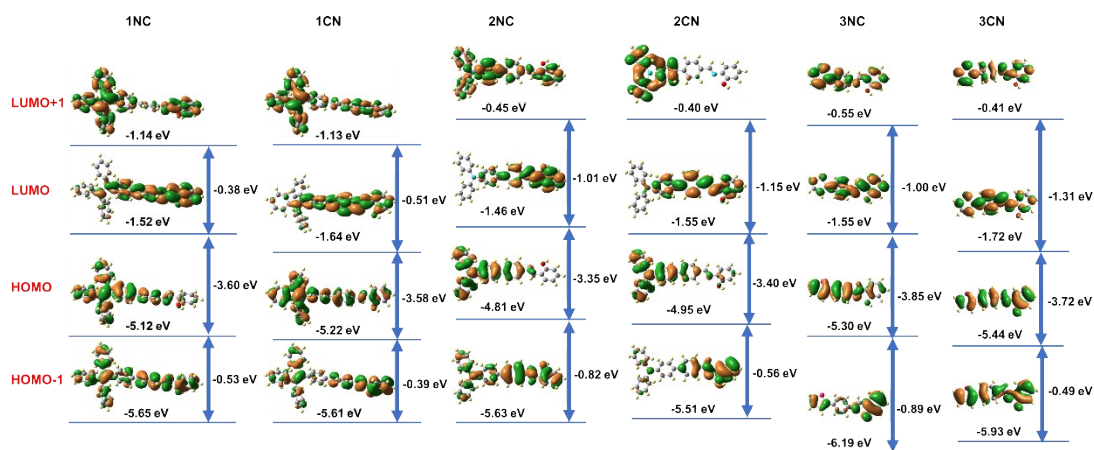

Fig. S6 Frontier molecular orbital diagram of 1–3NC and 1–3CN by DFT calculation.

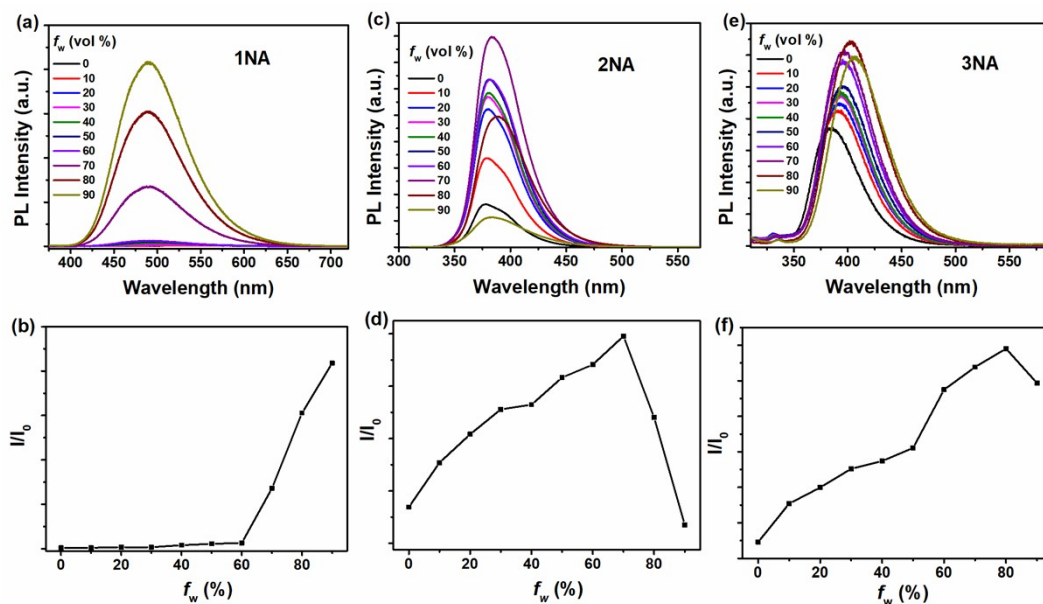

Fig. S7 PL spectra of (a) 1NA, (c) 2NA, (e) 3NA in the mixture of acetone/H<sub>2</sub>O (25 μM,  $f_w$  from 0 to 90%) and the corresponding variations in PL intensity ( $I/I_0$ ) of (b) 1NA, (d) 2NA, (f) 3NA with  $f_w$ .

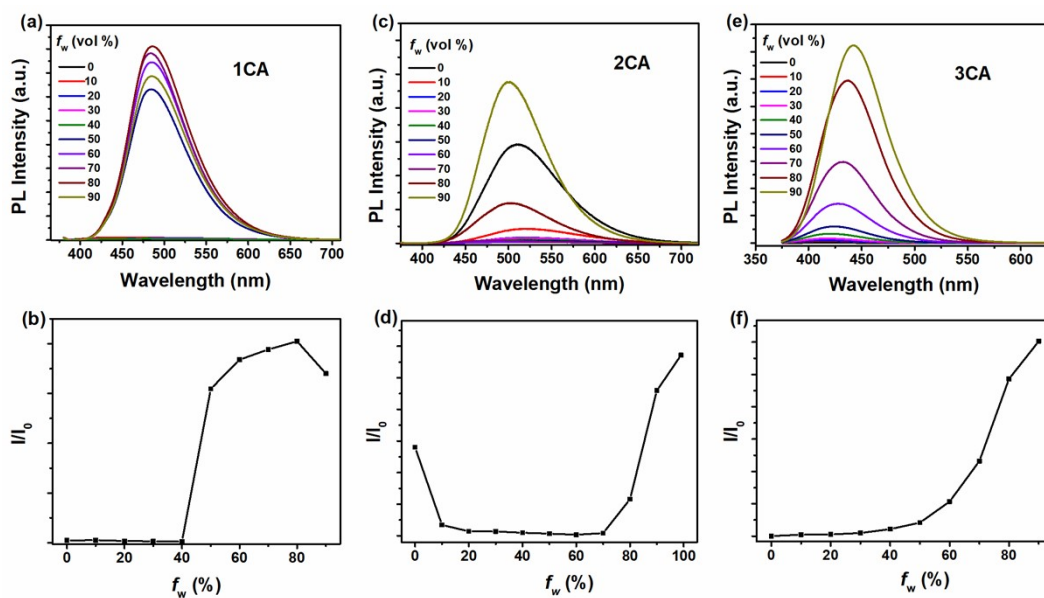

Fig. S8 Emission spectra of (a) **1CA**, (c) **2CA**, (e) **3CA** in the mixture of acetone/H<sub>2</sub>O (25  $\mu$ M,  $f_w$  from 0 to 90%) and the corresponding variations in PL intensity ( $I/I_0$ ) of (b) **1CA**, (d) **2CA**, (f) **3CA** with  $f_w$ .

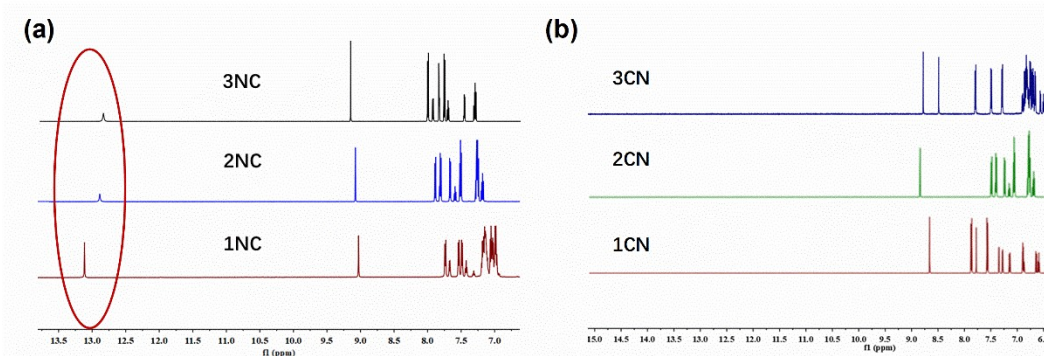

Fig. S9 Partial <sup>1</sup>H NMR spectra of (a) **1–3NC** and (b) **1–3CN**.

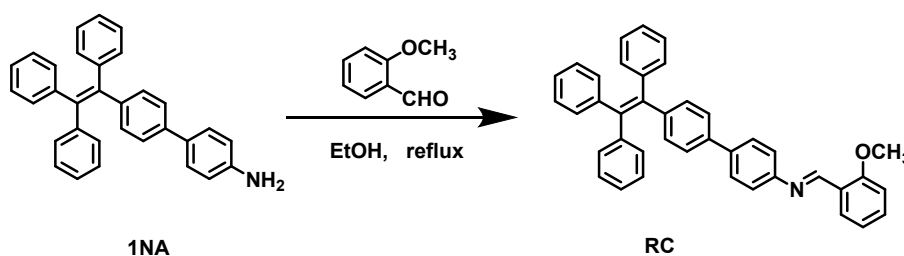

Fig. S10 Synthetic routes of compound **RC**.

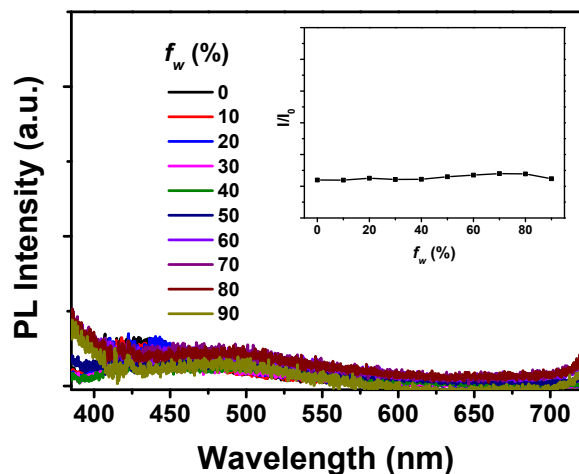

Fig. S11 Emission spectra of **RC** in the mixture of acetone/H<sub>2</sub>O (25  $\mu$ M,  $f_w$  from 0 to 90%). Inset: Variations in PL intensity ( $I/I_0$ ) with  $f_w$ .

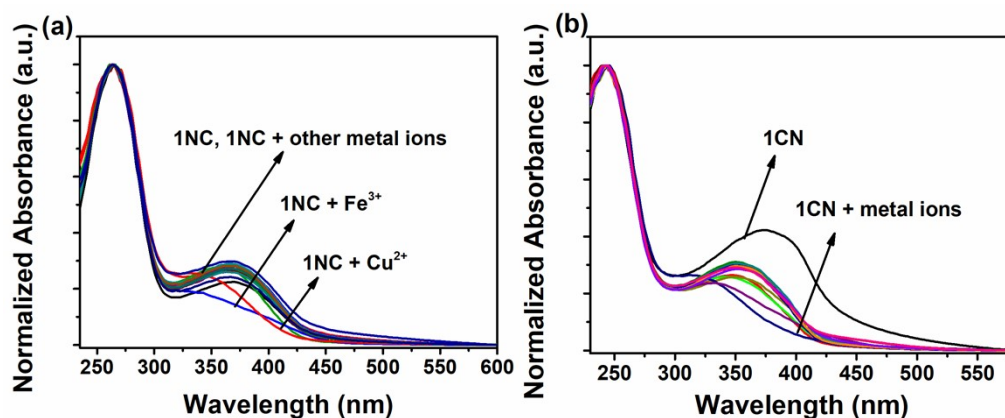

Fig. S12 Absorption spectra of (a) **1NC** (25  $\mu$ M) and (b) **1CN** (25  $\mu$ M) towards metal ions (10 mM) in acetone/H<sub>2</sub>O mixture (v: v, 1: 99).

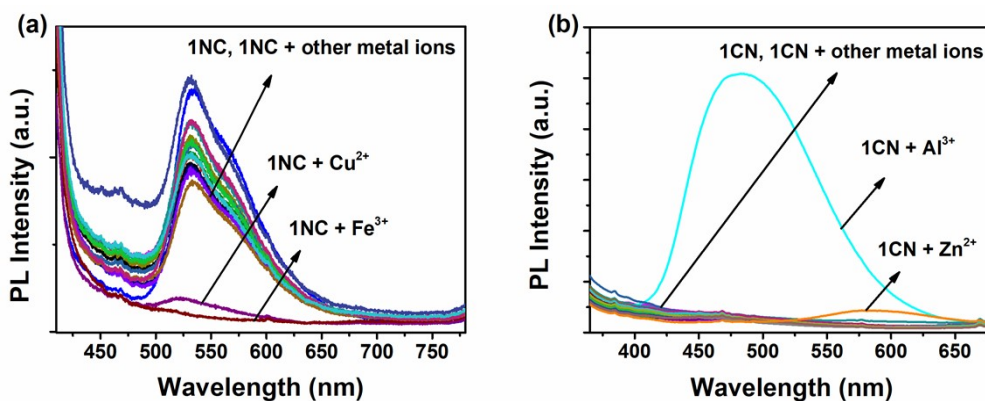

Fig. S13 Emission spectra of the test papers made of (a) **1NC** (25  $\mu$ M) and (b) **1CN** (25  $\mu$ M) dripped with various metal ions.

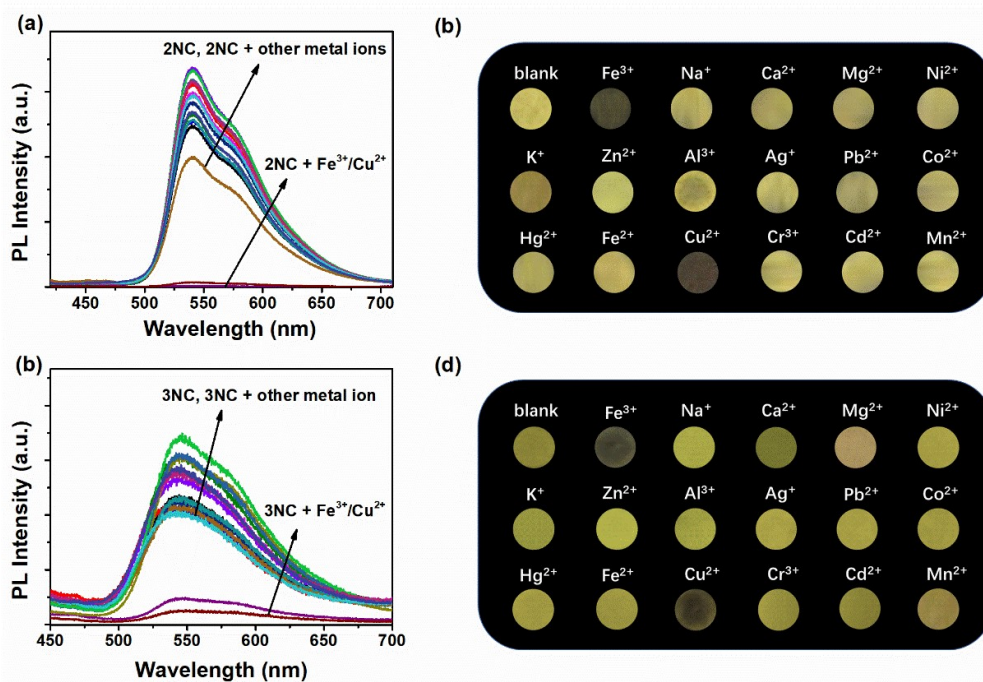

Fig. S14 Absorption spectra of (a) 2NC (25 μM) and (b) 3NC (25 μM) towards metal ions (10 mM) in acetone/ H<sub>2</sub>O mixture (v: v, 1: 99). The images of (c) 2NC and (d) 3NC towards metal ions on test papers.

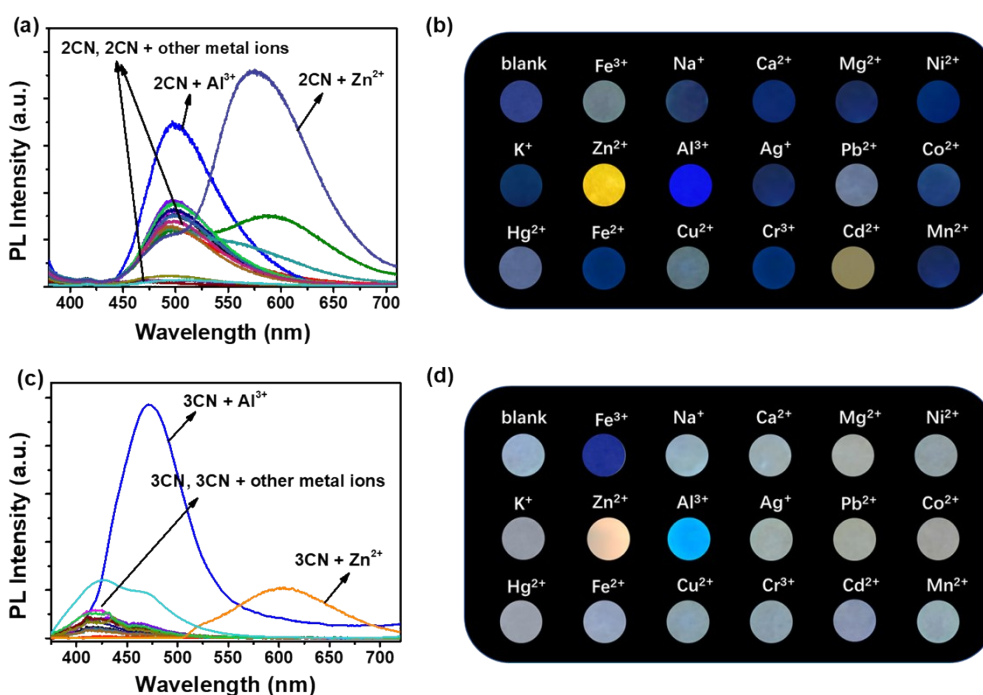

Fig. S15 Absorption spectra of (a) 2CN (25 μM) and (b) 3CN (25 μM) towards metal ions (10 mM) in acetone/H<sub>2</sub>O mixture (v: v, 1: 99). The images of (c) 2CN and (d) 3CN towards metal ions on test papers.

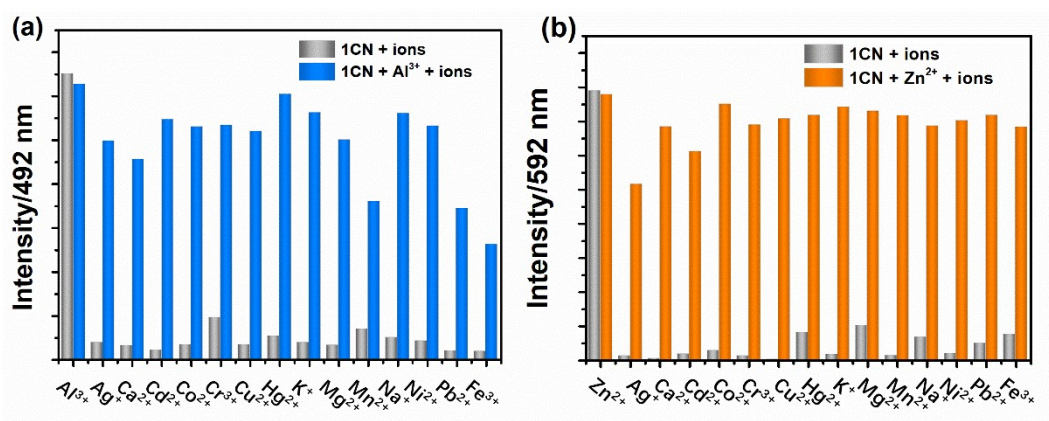

Fig. S16 PL intensity of 1CN (25 μM) at (a) 492 nm and (b) 592 nm in the presence of other competing metal ions (10 mM) before and after adding Al<sup>3+</sup> (10 mM) and Zn<sup>2+</sup> (10 mM) in acetone/H<sub>2</sub>O mixture (v: v, 1: 99), respectively.

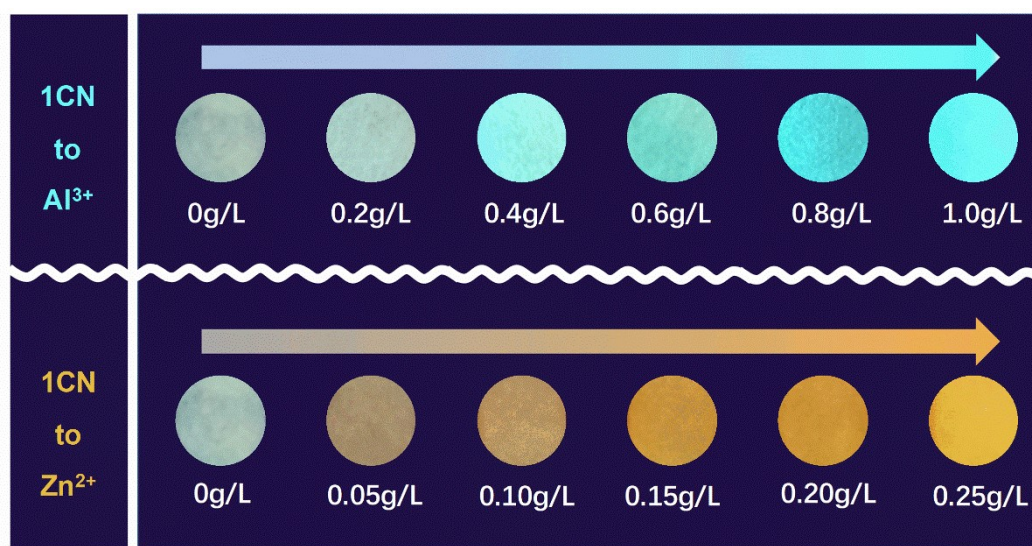

Fig. S17 Fluorescent colorimetric cards for detection of Al<sup>3+</sup> and Zn<sup>2+</sup>.

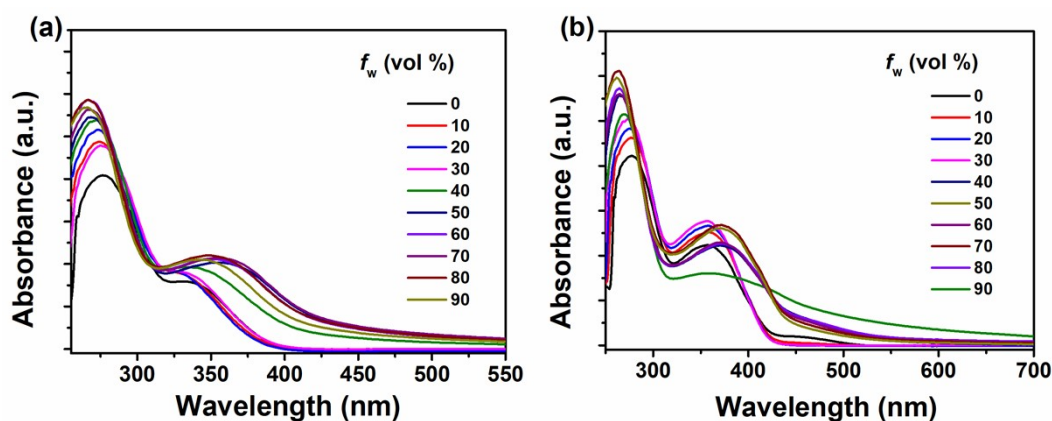

Fig. S18 Absorption spectra of (a) **1CN** (25  $\mu\text{M}$ ) with  $\text{Al}^{3+}$  (10 mM) and (b)  $\text{Zn}^{2+}$  (10 mM) in the mixture of acetone/ $\text{H}_2\text{O}$  ( $f_w$  from 0 to 90%).

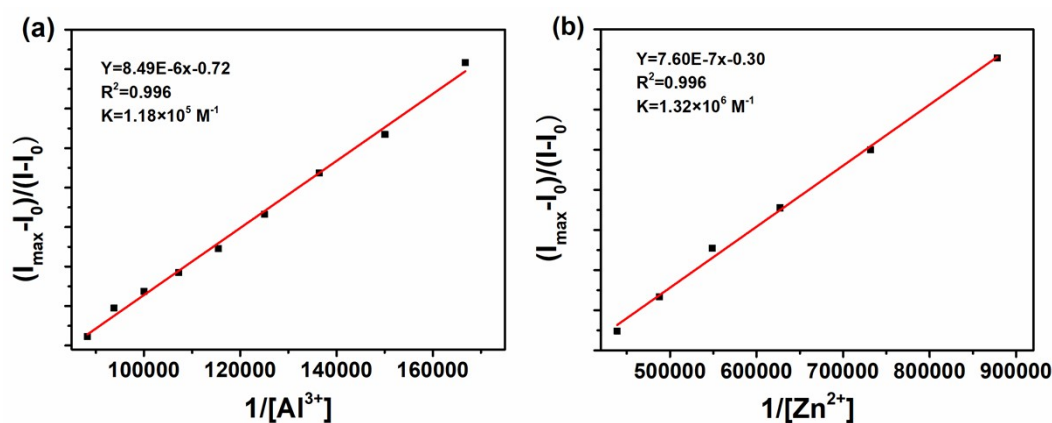

Fig. S19 Benesi-Hildebrand plot of **1CN** towards (a)  $\text{Al}^{3+}$  and (b)  $\text{Zn}^{2+}$ .

### 3. Tables

**Table S1** Crystal data and structure refinement for **1NC** CCDC: 2107085

|                     |                                       |
|---------------------|---------------------------------------|
| Identification code | <b>1NC</b>                            |
| Empirical formula   | $\text{C}_{39}\text{H}_{29}\text{NO}$ |
| Formula weight      | 527.63                                |
| Temperature/K       | 202(40)                               |
| Crystal system      | monoclinic                            |
| Space group         | $\text{P2}_1/\text{n}$                |

|                                                |                                                                   |
|------------------------------------------------|-------------------------------------------------------------------|
| a/Å                                            | 9.9207(3)                                                         |
| b/Å                                            | 9.2558(3)                                                         |
| c/Å                                            | 61.9023(18)                                                       |
| $\alpha/^\circ$                                | 90.00                                                             |
| $\beta/^\circ$                                 | 90.167(3)                                                         |
| $\gamma/^\circ$                                | 90.00                                                             |
| Volume/Å <sup>3</sup>                          | 5684.1(3)                                                         |
| Z                                              | 8                                                                 |
| $\rho_{\text{calc}}/\text{g}/\text{cm}^3$      | 1.233                                                             |
| $\mu/\text{mm}^{-1}$                           | 0.563                                                             |
| F(000)                                         | 2224.0                                                            |
| Crystal size/mm <sup>3</sup>                   | 0.07 × 0.02 × 0.01                                                |
| Radiation                                      | CuK $\alpha$ ( $\lambda = 1.54184$ )                              |
| 2 $\Theta$ range for data collection/ $^\circ$ | 8.58 to 139.88                                                    |
| Index ranges                                   | -11 ≤ h ≤ 11, -11 ≤ k ≤ 7, -74 ≤ l ≤ 65                           |
| Reflections collected                          | 23812                                                             |
| Independent reflections                        | 10543 [ $R_{\text{int}} = 0.0382$ , $R_{\text{sigma}} = 0.0487$ ] |
| Data/restraints/parameters                     | 10543/43/768                                                      |
| Goodness-of-fit on F <sup>2</sup>              | 1.108                                                             |
| Final R indexes [ $I \geq 2\sigma(I)$ ]        | $R_1 = 0.0885$ , $wR_2 = 0.1989$                                  |
| Final R indexes [all data]                     | $R_1 = 0.1009$ , $wR_2 = 0.2053$                                  |
| Largest diff. peak/hole / e Å <sup>-3</sup>    | 0.41/-0.39                                                        |

**Table S2** Crystal data and structure refinement for **1CN CCDC: 2107068**

|                     |                                                               |
|---------------------|---------------------------------------------------------------|
| Identification code | <b>1CN</b>                                                    |
| Empirical formula   | <b>C<sub>78</sub>H<sub>58</sub>N<sub>2</sub>O<sub>2</sub></b> |



|                                             |                                                                 |
|---------------------------------------------|-----------------------------------------------------------------|
| Formula weight                              | 1055.26                                                         |
| Temperature/K                               | 293.63(10)                                                      |
| Crystal system                              | monoclinic                                                      |
| Space group                                 | P2 <sub>1</sub> /n                                              |
| a/Å                                         | 9.9949(7)                                                       |
| b/Å                                         | 9.4404(9)                                                       |
| c/Å                                         | 61.749(5)                                                       |
| $\alpha$ /°                                 | 90.00                                                           |
| $\beta$ /°                                  | 91.980(7)                                                       |
| $\gamma$ /°                                 | 90.00                                                           |
| Volume/Å <sup>3</sup>                       | 5822.8(8)                                                       |
| Z                                           | 4                                                               |
| $\rho_{\text{calc}}$ /cm <sup>3</sup>       | 1.204                                                           |
| $\mu$ /mm <sup>-1</sup>                     | 0.550                                                           |
| F(000)                                      | 2224.0                                                          |
| Crystal size/mm <sup>3</sup>                | 0.09 × 0.07 × 0.03                                              |
| Radiation                                   | CuK $\alpha$ ( $\lambda$ = 1.54184)                             |
| 2 $\Theta$ range for data collection/°      | 8.6 to 142.38                                                   |
| Index ranges                                | -6 ≤ h ≤ 11, -11 ≤ k ≤ 10, -74 ≤ l ≤ 69                         |
| Reflections collected                       | 21827                                                           |
| Independent reflections                     | 10708 [ $R_{\text{int}}$ = 0.0525, $R_{\text{sigma}}$ = 0.0831] |
| Data/restraints/parameters                  | 10708/0/741                                                     |
| Goodness-of-fit on F <sup>2</sup>           | 1.034                                                           |
| Final R indexes [ $I \geq 2\sigma(I)$ ]     | $R_1$ = 0.0930, $wR_2$ = 0.2058                                 |
| Final R indexes [all data]                  | $R_1$ = 0.1319, $wR_2$ = 0.2317                                 |
| Largest diff. peak/hole / e Å <sup>-3</sup> | 0.26/-0.28                                                      |

---

**Table S3** Crystal data and structure refinement for **2NC** CCDC: 2107082

---

|                                        |                                                                |
|----------------------------------------|----------------------------------------------------------------|
| Identification code                    | <b>2NC</b>                                                     |
| Empirical formula                      | C <sub>62</sub> H <sub>48</sub> N <sub>4</sub> O <sub>2</sub>  |
| Formula weight                         | 881.04                                                         |
| Temperature/K                          | 301.95(10)                                                     |
| Crystal system                         | monoclinic                                                     |
| Space group                            | P2 <sub>1</sub> /c                                             |
| a/Å                                    | 26.9099(11)                                                    |
| b/Å                                    | 9.5273(3)                                                      |
| c/Å                                    | 19.2556(8)                                                     |
| $\alpha$ /°                            | 90                                                             |
| $\beta$ /°                             | 108.442(4)                                                     |
| $\gamma$ /°                            | 90                                                             |
| Volume/Å <sup>3</sup>                  | 4683.2(3)                                                      |
| Z                                      | 4                                                              |
| $\rho_{\text{calc}}/\text{cm}^3$       | 1.250                                                          |
| $\mu/\text{mm}^{-1}$                   | 0.076                                                          |
| F(000)                                 | 1856.0                                                         |
| Crystal size/mm <sup>3</sup>           | 0.12 × 0.07 × 0.05                                             |
| Radiation                              | Mo K $\alpha$ ( $\lambda$ = 0.71073)                           |
| 2 $\Theta$ range for data collection/° | 4.234 to 62.18                                                 |
| Index ranges                           | -33 ≤ h ≤ 30, -13 ≤ k ≤ 11, -23 ≤ l ≤ 24                       |
| Reflections collected                  | 45770                                                          |
| Independent reflections                | 11907 [R <sub>int</sub> = 0.0415, R <sub>sigma</sub> = 0.0425] |

|                                             |                                                   |
|---------------------------------------------|---------------------------------------------------|
| Data/restraints/parameters                  | 11907/30/615                                      |
| Goodness-of-fit on F <sup>2</sup>           | 1.052                                             |
| Final R indexes [I>2σ(I)]                   | R <sub>1</sub> = 0.0553, wR <sub>2</sub> = 0.1524 |
| Final R indexes [all data]                  | R <sub>1</sub> = 0.1073, wR <sub>2</sub> = 0.1828 |
| Largest diff. peak/hole / e Å <sup>-3</sup> | 0.15/-0.26                                        |

---

**Table S4** Crystal data and structure refinement for **2CN CCDC: 2107078**

---

|                                    |                                                               |
|------------------------------------|---------------------------------------------------------------|
| Identification code                | <b>2CN</b>                                                    |
| Empirical formula                  | C <sub>62</sub> H <sub>48</sub> N <sub>4</sub> O <sub>2</sub> |
| Formula weight                     | 881.04                                                        |
| Temperature/K                      | 302.00(10)                                                    |
| Crystal system                     | triclinic                                                     |
| Space group                        | P-1                                                           |
| a/Å                                | 10.3835(6)                                                    |
| b/Å                                | 10.7250(6)                                                    |
| c/Å                                | 24.4935(12)                                                   |
| α/°                                | 77.553(4)                                                     |
| β/°                                | 79.932(5)                                                     |
| γ/°                                | 63.410(5)                                                     |
| Volume/Å <sup>3</sup>              | 2372.2(2)                                                     |
| Z                                  | 2                                                             |
| ρ <sub>calc</sub> /cm <sup>3</sup> | 1.233                                                         |
| μ/mm <sup>-1</sup>                 | 0.075                                                         |
| F(000)                             | 928.0                                                         |
| Crystal size/mm <sup>3</sup>       | 0.08 × 0.05 × 0.04                                            |
| Radiation                          | Mo Kα (λ = 0.71073)                                           |

|                                                  |                                                                    |
|--------------------------------------------------|--------------------------------------------------------------------|
| 2 $\Theta$ range for data collection/ $^{\circ}$ | 3.42 to 62.012                                                     |
| Index ranges                                     | $-14 \leq h \leq 13$ , $-14 \leq k \leq 13$ , $-33 \leq l \leq 30$ |
| Reflections collected                            | 29160                                                              |
| Independent reflections                          | 11743 [ $R_{\text{int}} = 0.0373$ , $R_{\text{sigma}} = 0.0576$ ]  |
| Data/restraints/parameters                       | 11743/0/633                                                        |
| Goodness-of-fit on $F^2$                         | 1.023                                                              |
| Final R indexes [ $I \geq 2\sigma(I)$ ]          | $R_1 = 0.0699$ , $wR_2 = 0.1611$                                   |
| Final R indexes [all data]                       | $R_1 = 0.1567$ , $wR_2 = 0.1918$                                   |
| Largest diff. peak/hole / $e \text{ \AA}^{-3}$   | 0.20/-0.19                                                         |

**Table S5** Crystal data and structure refinement for **3NC CCDC: 2120445**

|                        |                         |
|------------------------|-------------------------|
| Identification code    | LD_1_3_autored          |
| Empirical formula      | $C_{34}H_{26}N_2O_2S_2$ |
| Formula weight         | 558.730                 |
| Temperature/K          | N/A                     |
| Crystal system         | monoclinic              |
| Space group            | I2                      |
| a/ $\text{\AA}$        | 7.3383(2)               |
| b/ $\text{\AA}$        | 6.1634(2)               |
| c/ $\text{\AA}$        | 60.9206(16)             |
| $\alpha/^{\circ}$      | 90                      |
| $\beta/^{\circ}$       | 93.020(2)               |
| $\gamma/^{\circ}$      | 90                      |
| Volume/ $\text{\AA}^3$ | 2751.54(14)             |
| Z                      | 4                       |

|                                                |                                                               |
|------------------------------------------------|---------------------------------------------------------------|
| $\rho_{\text{calc}}/\text{cm}^3$               | 1.349                                                         |
| $\mu/\text{mm}^{-1}$                           | 2.031                                                         |
| F(000)                                         | 1173.9                                                        |
| Crystal size/ $\text{mm}^3$                    | $0.09 \times 0.04 \times 0.01$                                |
| Radiation                                      | Cu K $\alpha$ ( $\lambda = 1.54184$ )                         |
| $2\Theta$ range for data collection/ $^\circ$  | 5.82 to 154.92                                                |
| Index ranges                                   | $-9 \leq h \leq 8, -7 \leq k \leq 7, -74 \leq l \leq 75$      |
| Reflections collected                          | 14483                                                         |
| Independent reflections                        | 5162 [ $R_{\text{int}} = 0.0770, R_{\text{sigma}} = 0.0503$ ] |
| Data/restraints/parameters                     | 5162/2/363                                                    |
| Goodness-of-fit on $F^2$                       | 1.116                                                         |
| Final R indexes [ $I \geq 2\sigma(I)$ ]        | $R_1 = 0.0923, wR_2 = 0.2607$                                 |
| Final R indexes [all data]                     | $R_1 = 0.1022, wR_2 = 0.2731$                                 |
| Largest diff. peak/hole / $e \text{ \AA}^{-3}$ | 0.83/-0.46                                                    |

**Table S6** Crystal data and structure refinement for **3CN CCDC: 2107090**

|                     |                                        |
|---------------------|----------------------------------------|
| Identification code | <b>3CN</b>                             |
| Empirical formula   | $\text{C}_{17}\text{H}_{13}\text{NOS}$ |
| Formula weight      | 279.34                                 |
| Temperature/K       | 293(2)                                 |
| Crystal system      | triclinic                              |
| Space group         | P-1                                    |
| $a/\text{\AA}$      | 5.9514(7)                              |
| $b/\text{\AA}$      | 16.012(3)                              |
| $c/\text{\AA}$      | 16.264(4)                              |
| $\alpha/^\circ$     | 63.516(19)                             |

|                                                |                                                               |
|------------------------------------------------|---------------------------------------------------------------|
| $\beta/^\circ$                                 | 82.231(14)                                                    |
| $\gamma/^\circ$                                | 85.875(12)                                                    |
| Volume/ $\text{\AA}^3$                         | 1374.4(5)                                                     |
| Z                                              | 4                                                             |
| $\rho_{\text{calc}}/\text{g}/\text{cm}^3$      | 1.350                                                         |
| $\mu/\text{mm}^{-1}$                           | 2.033                                                         |
| F(000)                                         | 584.0                                                         |
| Crystal size/ $\text{mm}^3$                    | $0.17 \times 0.14 \times 0.02$                                |
| Radiation                                      | CuK $\alpha$ ( $\lambda = 1.54184$ )                          |
| 2 $\Theta$ range for data collection/ $^\circ$ | 10.434 to 133.17                                              |
| Index ranges                                   | $-7 \leq h \leq 4, -18 \leq k \leq 19, -18 \leq l \leq 19$    |
| Reflections collected                          | 7995                                                          |
| Independent reflections                        | 4659 [ $R_{\text{int}} = 0.0339, R_{\text{sigma}} = 0.0518$ ] |
| Data/restraints/parameters                     | 4659/0/369                                                    |
| Goodness-of-fit on $F^2$                       | 1.047                                                         |
| Final R indexes [ $I \geq 2\sigma(I)$ ]        | $R_1 = 0.0612, wR_2 = 0.1701$                                 |
| Final R indexes [all data]                     | $R_1 = 0.0836, wR_2 = 0.2050$                                 |
| Largest diff. peak/hole / $e \text{\AA}^{-3}$  | 0.37/-0.47                                                    |

---

**Table S7** Recovery study of 1CN to Al<sup>3+</sup> in spiked water samples.

| Sample         | Al <sup>3+</sup> spiked (M) | Al <sup>3+</sup> recovered (M) | Recovery (%) | Standard error(%) | RSD   |
|----------------|-----------------------------|--------------------------------|--------------|-------------------|-------|
| Tap water      | 6.00×10 <sup>-6</sup>       | 5.84×10 <sup>-6</sup>          | 97.3         | 2.7               | 0.057 |
|                | 9.00×10 <sup>-6</sup>       | 8.73×10 <sup>-6</sup>          | 97.0         | 3.0               | 0.066 |
|                | 1.20×10 <sup>-5</sup>       | 1.22×10 <sup>-5</sup>          | 101.7        | 1.7               | 0.081 |
|                | 1.50×10 <sup>-5</sup>       | 1.51×10 <sup>-5</sup>          | 100.5        | 0.5               | 0.108 |
|                | 1.80×10 <sup>-5</sup>       | 1.78×10 <sup>-5</sup>          | 98.8         | 1.2               | 0.041 |
| Drinking water | 6.00×10 <sup>-6</sup>       | 5.89×10 <sup>-6</sup>          | 98.1         | 1.9               | 0.054 |
|                | 9.00×10 <sup>-6</sup>       | 9.00×10 <sup>-6</sup>          | 100.0        | 0                 | 0.100 |
|                | 1.20×10 <sup>-5</sup>       | 1.22×10 <sup>-6</sup>          | 101.9        | 1.9               | 0.128 |
|                | 1.50×10 <sup>-5</sup>       | 1.47×10 <sup>-5</sup>          | 98.0         | 2.0               | 0.048 |
|                | 1.80×10 <sup>-5</sup>       | 1.79×10 <sup>-5</sup>          | 99.5         | 0.8               | 0.110 |
| River water    | 6.00×10 <sup>-6</sup>       | 6.02×10 <sup>-6</sup>          | 100.4        | 0.4               | 0.075 |
|                | 9.00×10 <sup>-6</sup>       | 8.88×10 <sup>-6</sup>          | 98.7         | 1.3               | 0.060 |
|                | 1.20×10 <sup>-5</sup>       | 1.17×10 <sup>-6</sup>          | 97.8         | 2.2               | 0.027 |
|                | 1.50×10 <sup>-5</sup>       | 1.47×10 <sup>-5</sup>          | 98.0         | 2.0               | 0.106 |
|                | 1.80×10 <sup>-5</sup>       | 1.76×10 <sup>-5</sup>          | 97.8         | 2.2               | 0.033 |

**Table S8** Recovery study of 1CN to Zn<sup>2+</sup> in spiked water samples.

| Sample         | Zn <sup>2+</sup> spiked (M) | Zn <sup>2+</sup> recovered (M) | Recovery (%) | Standard error(%) | RSD   |
|----------------|-----------------------------|--------------------------------|--------------|-------------------|-------|
| Tap water      | 3.00×10 <sup>-6</sup>       | 2.93×10 <sup>-6</sup>          | 97.6         | 2.4               | 0.070 |
|                | 6.00×10 <sup>-6</sup>       | 6.15×10 <sup>-6</sup>          | 102.5        | 2.5               | 0.058 |
|                | 9.00×10 <sup>-6</sup>       | 8.57×10 <sup>-6</sup>          | 98.7         | 1.3               | 0.090 |
|                | 1.20×10 <sup>-5</sup>       | 1.14×10 <sup>-5</sup>          | 97.6         | 2.4               | 0.081 |
|                | 1.50×10 <sup>-5</sup>       | 1.55×10 <sup>-5</sup>          | 103.1        | 3.1               | 0.106 |
| Drinking water | 3.00×10 <sup>-6</sup>       | 3.12×10 <sup>-6</sup>          | 102.5        | 2.5               | 0.055 |
|                | 6.00×10 <sup>-6</sup>       | 6.10×10 <sup>-6</sup>          | 101.6        | 1.6               | 0.067 |
|                | 9.00×10 <sup>-6</sup>       | 9.09×10 <sup>-6</sup>          | 101.0        | 1.0               | 0.031 |
|                | 1.20×10 <sup>-5</sup>       | 1.22×10 <sup>-5</sup>          | 102.0        | 2.0               | 0.093 |
|                | 1.50×10 <sup>-5</sup>       | 1.54×10 <sup>-5</sup>          | 102.5        | 2.5               | 0.042 |
| River water    | 3.00×10 <sup>-6</sup>       | 3.05×10 <sup>-6</sup>          | 101.5        | 1.5               | 0.046 |
|                | 6.00×10 <sup>-6</sup>       | 6.04×10 <sup>-6</sup>          | 100.6        | 0.6               | 0.064 |
|                | 9.00×10 <sup>-6</sup>       | 8.82×10 <sup>-6</sup>          | 98.0         | 2.0               | 0.054 |
|                | 1.20×10 <sup>-5</sup>       | 1.19×10 <sup>-5</sup>          | 98.9         | 1.1               | 0.116 |
|                | 1.50×10 <sup>-5</sup>       | 1.49×10 <sup>-5</sup>          | 99.7         | 0.3               | 0.079 |

#### 4. $^1\text{H}$ NMR and $^{13}\text{C}$ NMR

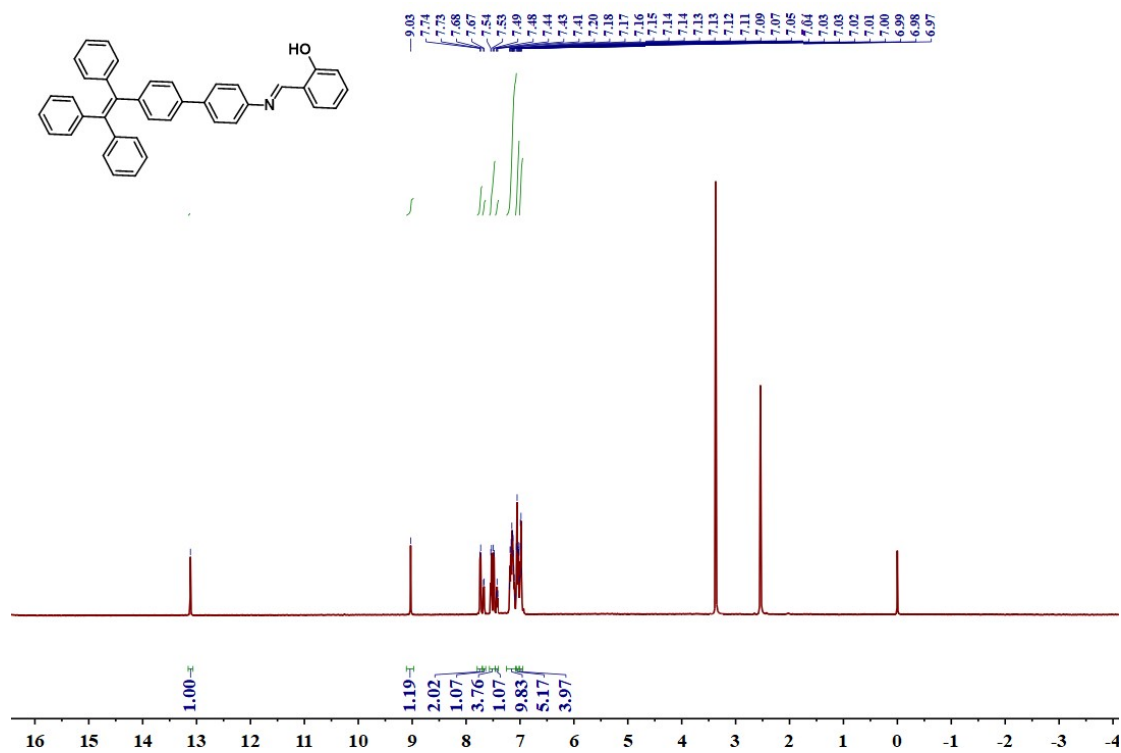

Fig. S20  $^1\text{H}$  NMR spectrum of **1NC** in  $\text{DMSO-}d_6$ .

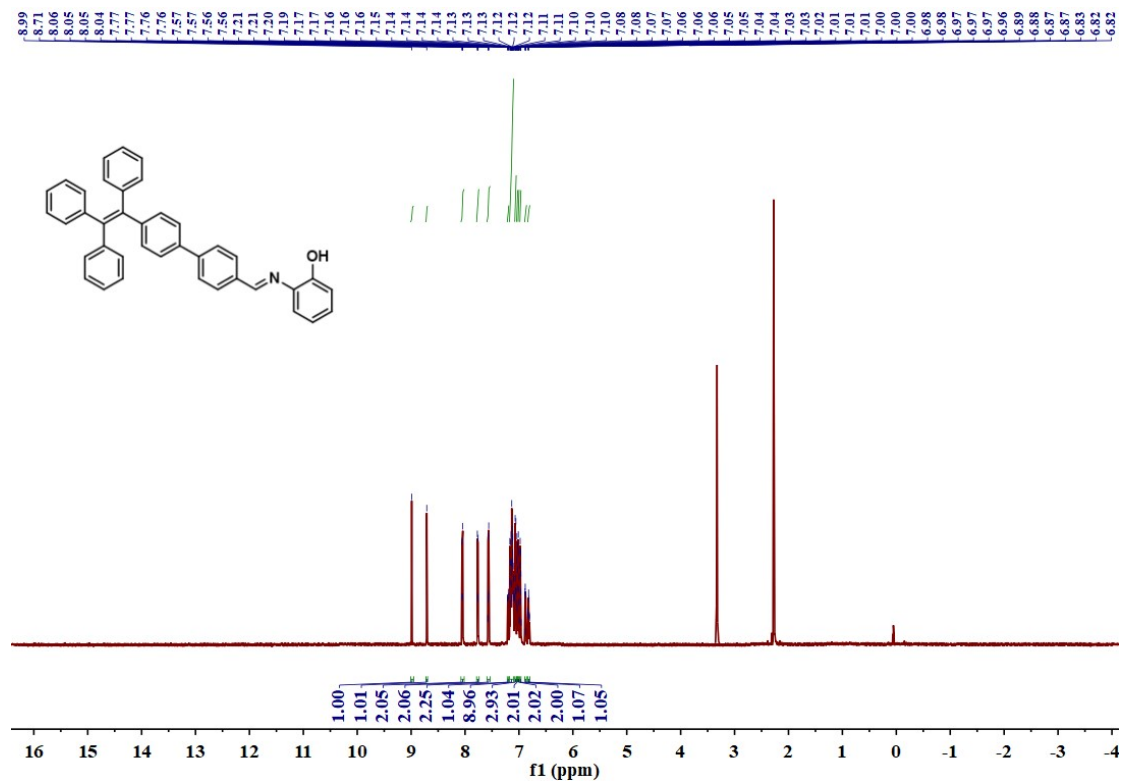

Fig. S21  $^1\text{H}$  NMR spectrum of **1CN** in  $\text{DMSO-}d_6$ .



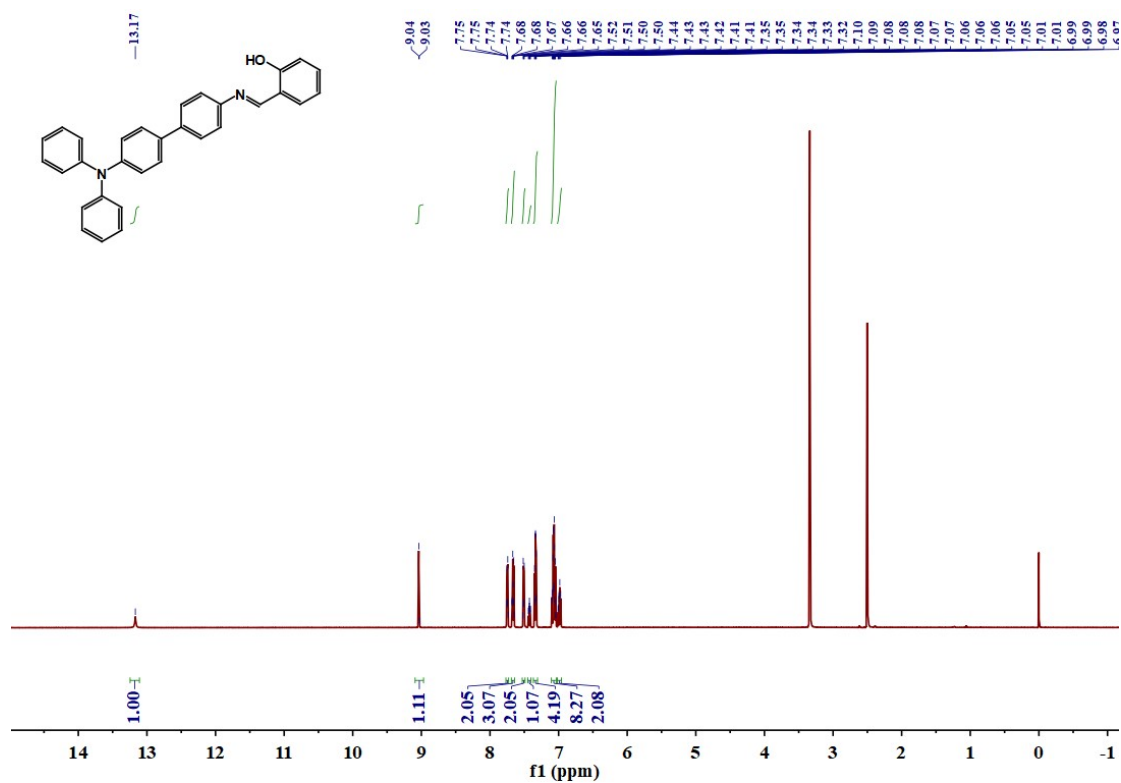

Fig. S22 <sup>1</sup>H NMR spectrum of 2NC in DMSO-*d*<sub>6</sub>.

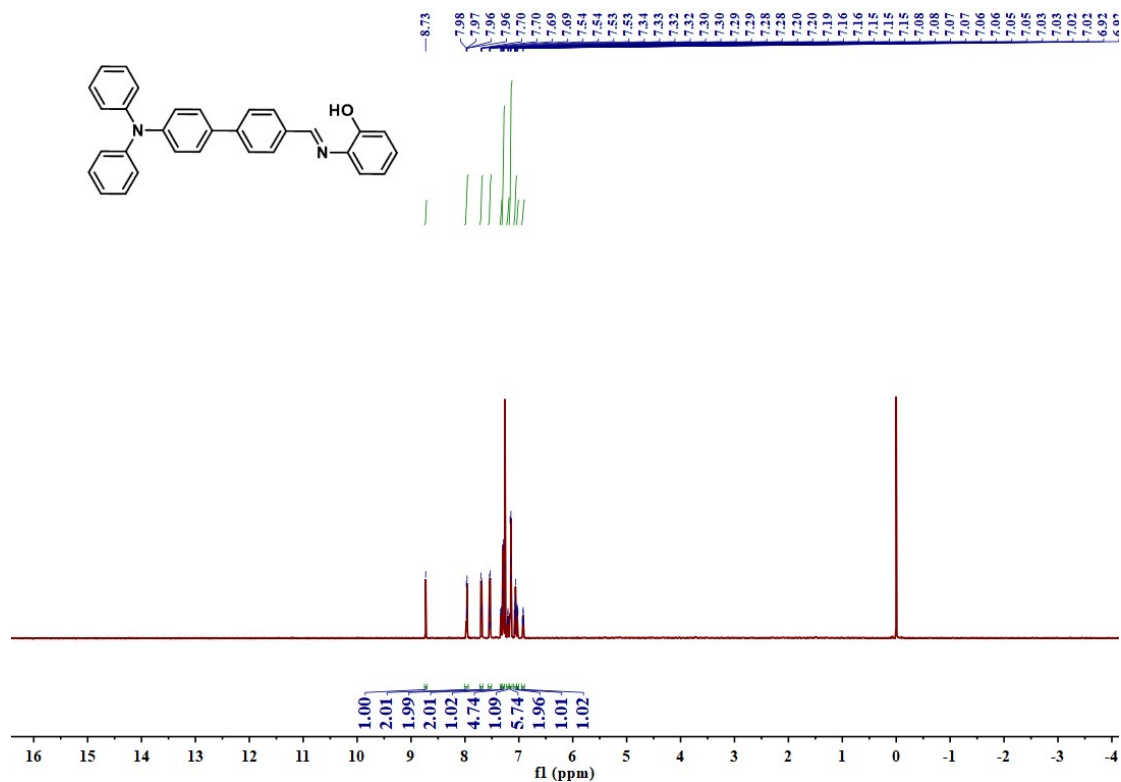

Fig. S23 <sup>1</sup>H NMR spectrum of 2CN in CDCl<sub>3</sub>.

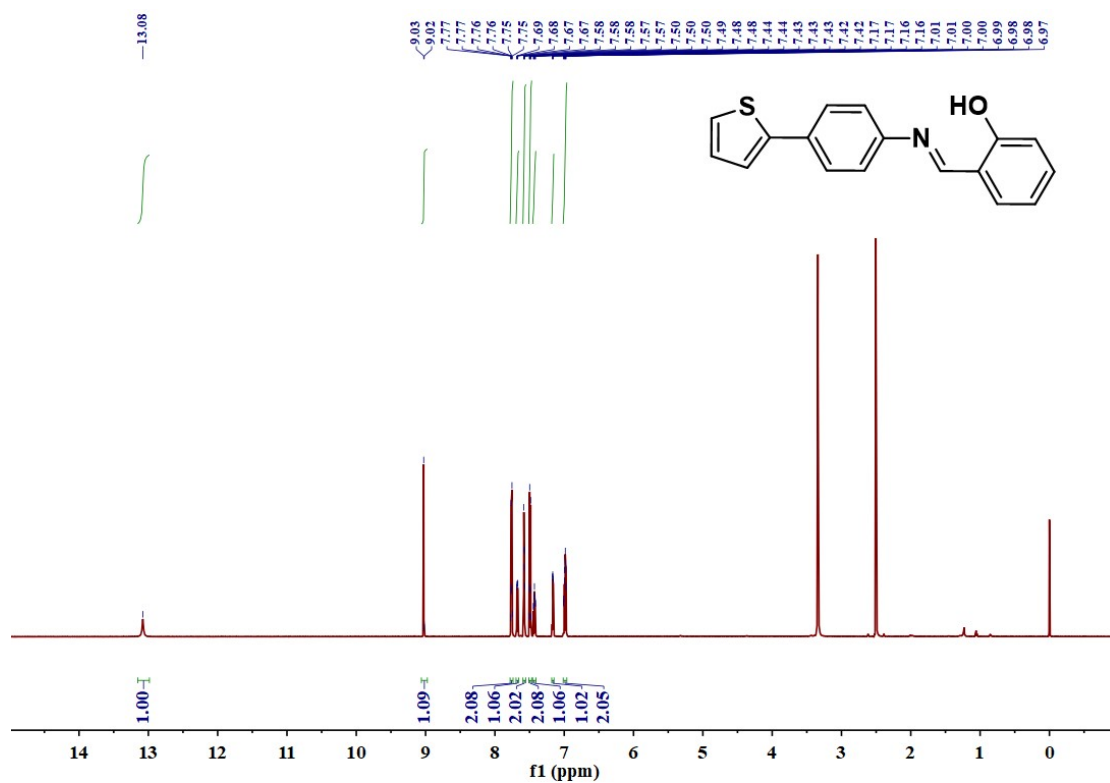

Fig. S24 <sup>1</sup>H NMR spectrum of 3NC in DMSO-*d*<sub>6</sub>.

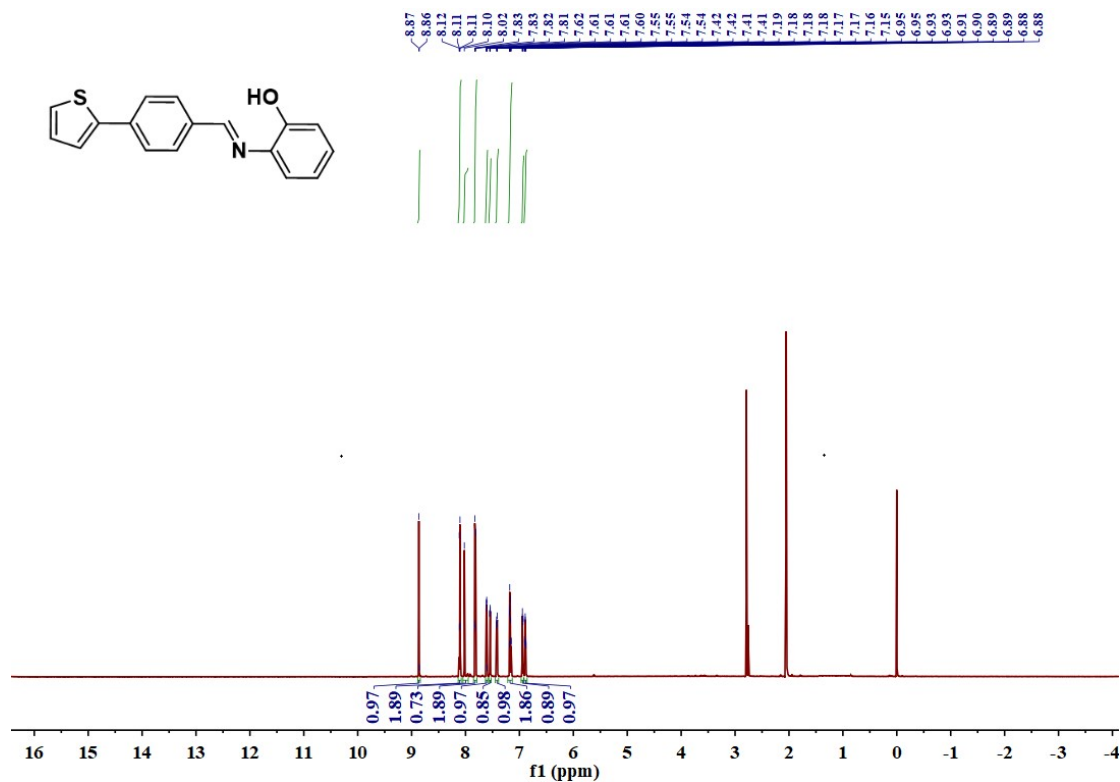

Fig. S25 <sup>1</sup>H NMR spectrum of 3CN in acetone-*d*<sub>6</sub>.

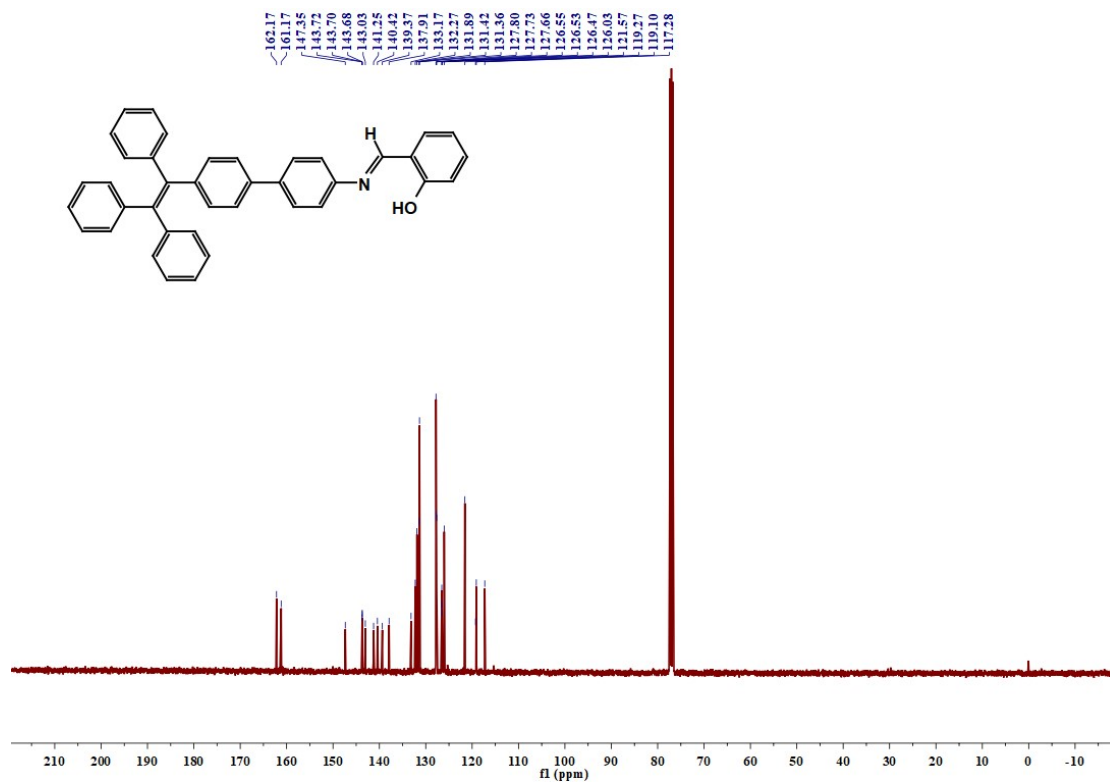

Fig. S26 <sup>13</sup>C NMR spectrum of 1NC in CDCl<sub>3</sub>.

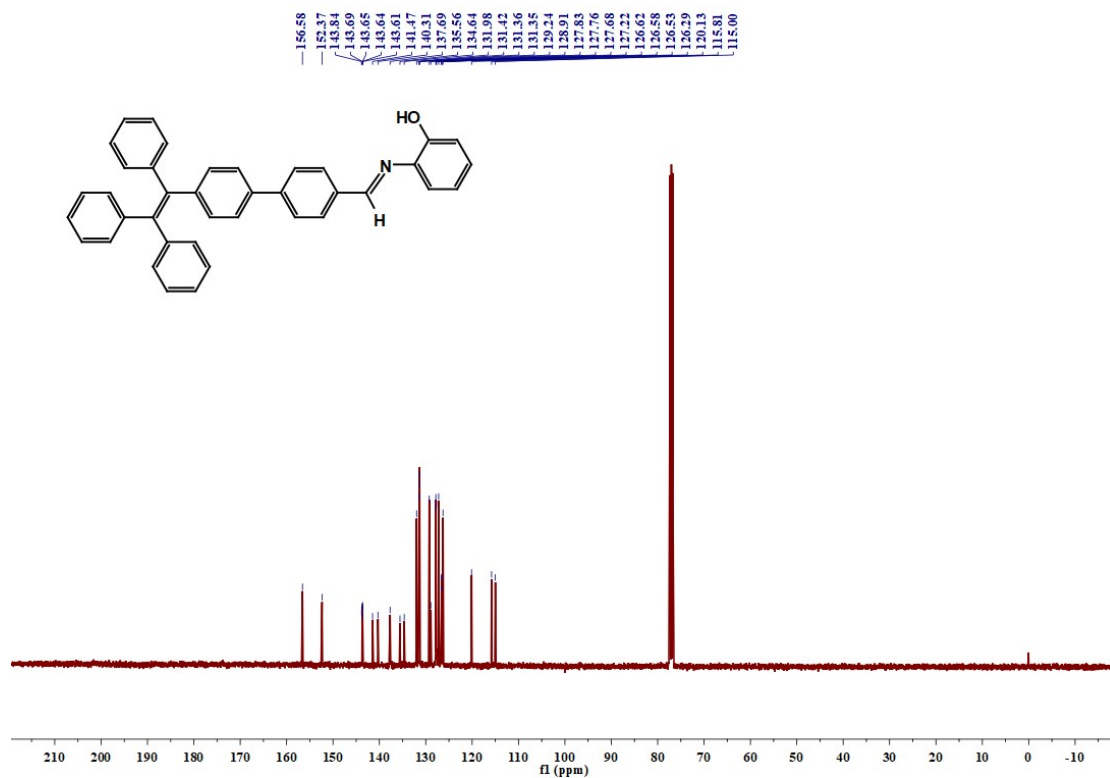

Fig. S27 <sup>13</sup>C NMR spectrum of 1CN in CDCl<sub>3</sub>.

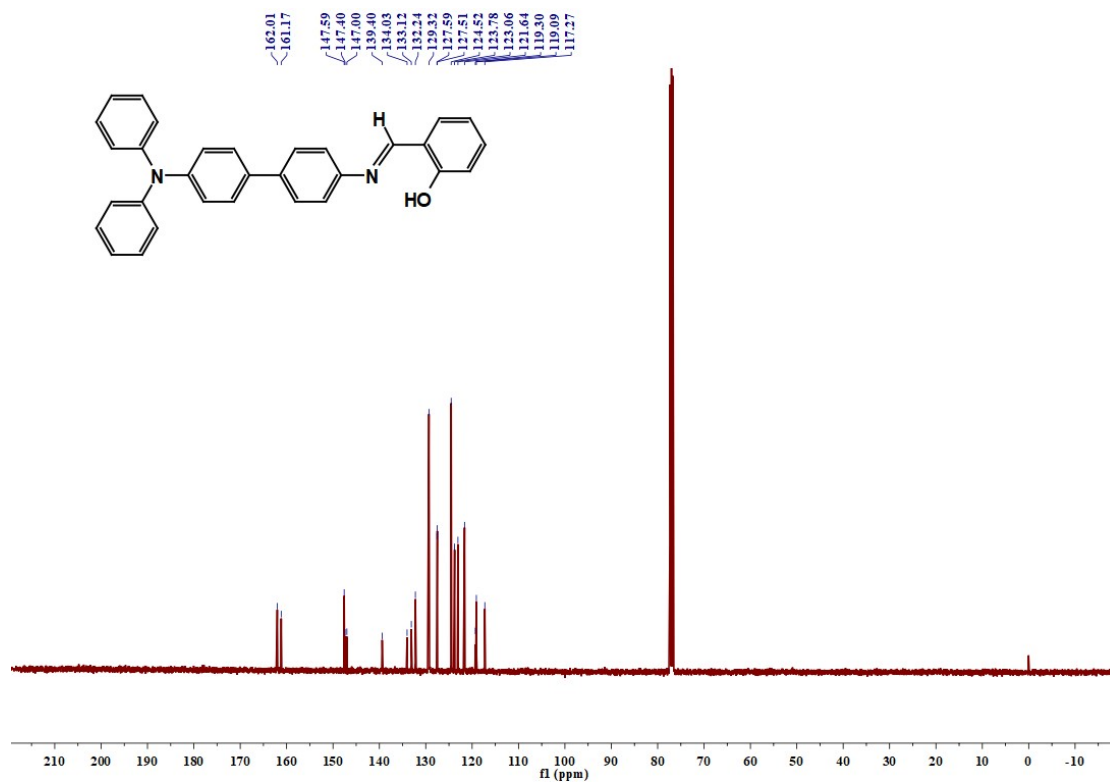

Fig. S28 <sup>13</sup>C NMR spectrum of **2NC** in CDCl<sub>3</sub>.

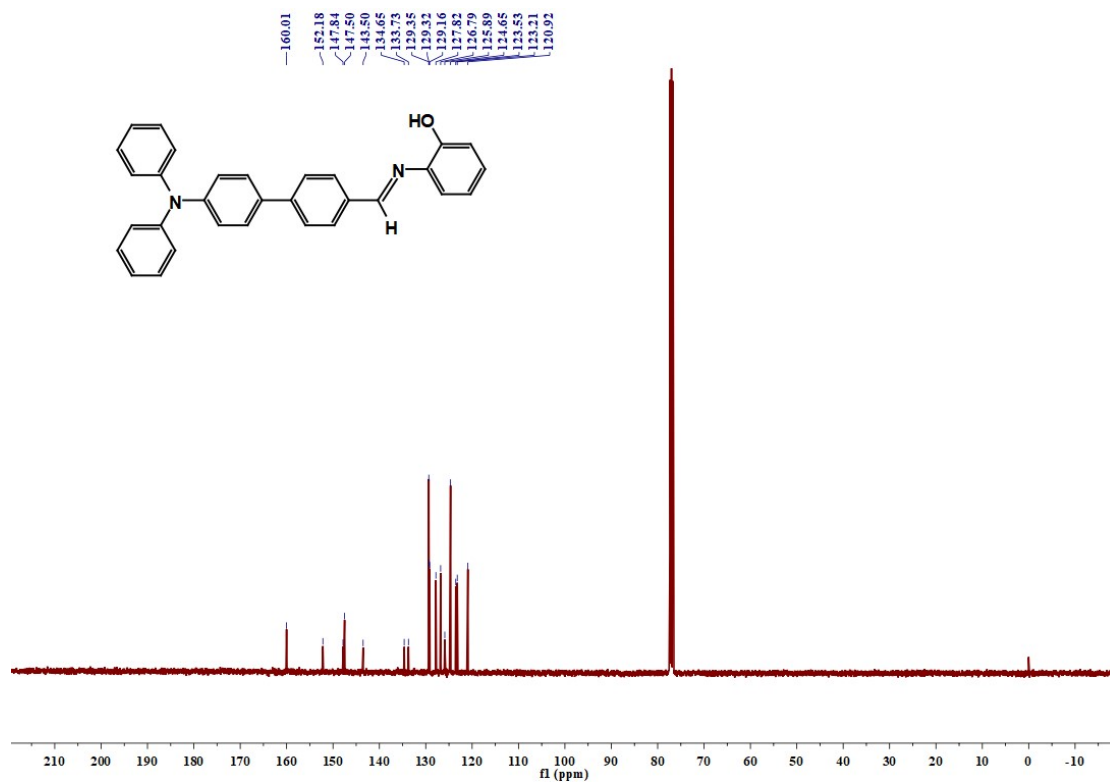

Fig. S29 <sup>13</sup>C NMR spectrum of **2CN** in CDCl<sub>3</sub>.

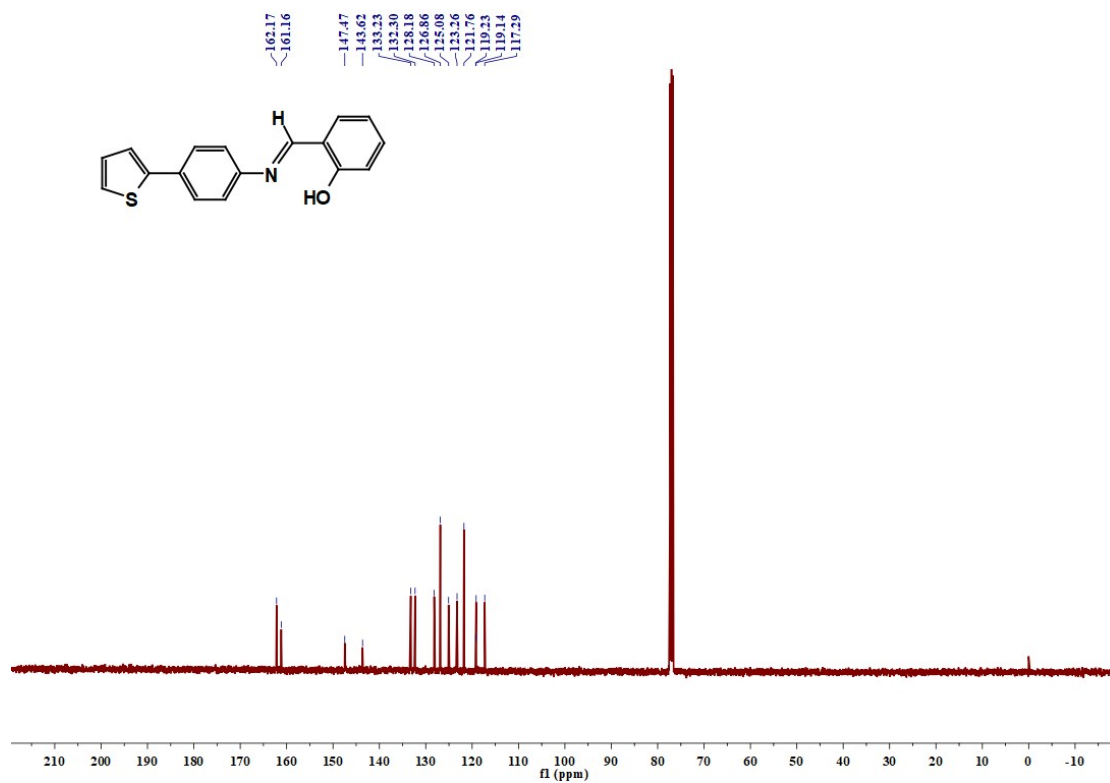

Fig. S30 <sup>13</sup>C NMR spectrum of **3NC** in CDCl<sub>3</sub>.

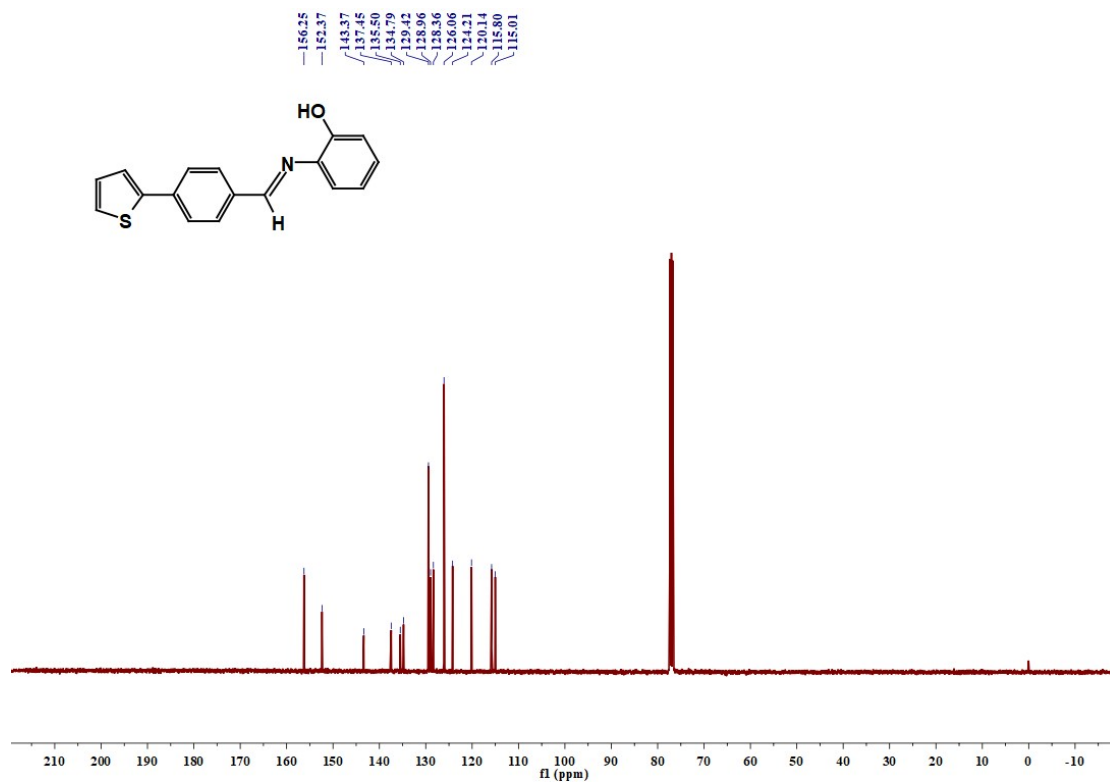

Fig. S31 <sup>13</sup>C NMR spectrum of **3CN** in CDCl<sub>3</sub>.

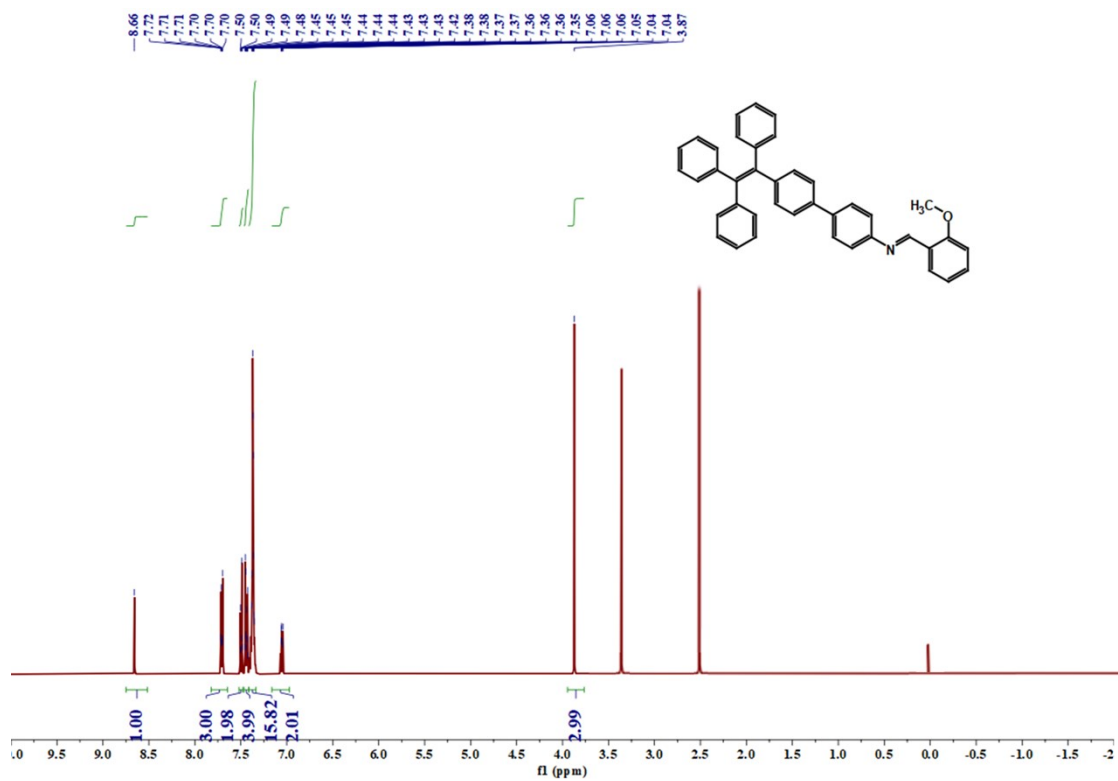

Fig. S32 <sup>1</sup>H NMR spectrum of **RC** in DMSO-*d*<sub>6</sub>.

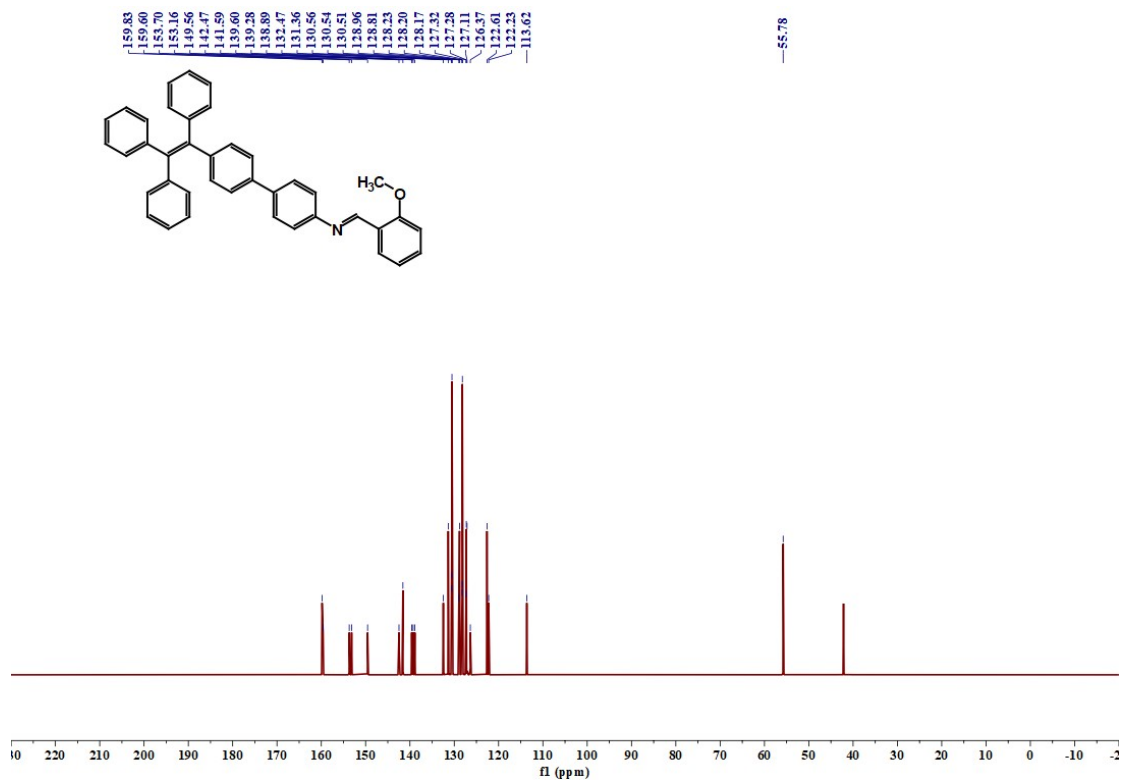

Fig. S33 <sup>13</sup>C NMR spectrum of **RC** in DMSO-*d*<sub>6</sub>.
